# Supplementary material
Source: PubMed Central journal article supplement (PMC2688860)
Supplement: 0812300106_SD1_PDF.pdf [file 0812300106_SD1_PDF.pdf]

Dataset S1. *Littorina littorea* haplotype frequency data for European and North American sites. Haplotype identities are colored according to their status as unique to Europe (yellow), unique to North America (blue), and shared between populations (white). A fourth category (purple) represents North American haplotypes basal to European haplotypes and therefore considered shared. In Europe, there were 30 sites: Moss, NOR (MO); Tjärnö, SWE (TJ); Varberg, SWE (VA); Copenhagen, DNK (CO); Nyborg, DNK (NY); Ubdyhoj, DNK (UB); Esbjerg, DNK (ES); Ostende, BEL (OS); Scheldt Estuary, NL (SC); Mindin, FRA (MI); Roscoff, FRA (RO); Trouville, FRA (TR); Bay d'Arcachon, FRA (BD); Vigo, Galicia, ESP (GA); St Andrew's, SCT (ST); Oban, SCT (OB); Peterhead, SCT (PH); Greenock, SCT (GR); Fort William, SCT (FtW); Ullapool, SCT (Ull); Cromarty, SCT (CR); Cardigan Bay, WLS (CA); Plymouth, ENG (PK); Robin Hood's Bay, ENG (RH); Whitstable, ENG (WH); Sligo, IRL (SL); Galway, IRL (GW); Limerick, IRL (LI); Dublin, IRL (DU); and Cork, IRL (CK). There were 29 North American sites: Red Bay, Labrador, CAN (RB); Blanc Sablon, QC, CAN (BL); Flower's Cove, NL, CAN (FL); Bonne Bay, NL, CAN (BO); Searston, NL, CAN (SE); Portugal Cove, NL, CAN (PB); North Sydney, NS, CAN (NS); Mulgrave, NS, CAN (MU); Halifax, NS, CAN (HA); Truro, NS, CAN (TO); Pictou, NS, CAN (PI); St Peter's Harbor, PE, CAN (SP); Pointe-Mitis, QC, CAN (PM); Iles de Mingan, QC, CAN (ID); Bay du Vin, NB, CAN (BV); St John, NB, CAN (SJ); Eastport, ME, USA (EA); Acadia, ME, USA (AC); Prout's Neck, ME, USA (PN); Wells, ME, USA (WE); York, ME, USA (YK); Fort Stark, NH, USA (FS); Plymouth, MA, USA (PL); Buzzard's Bay, MA, USA (BB); Sengakontacket Pond, Edgartown, MA, USA (SP); Stonington Point, CT, USA (SN); Crane's Neck, NY, USA (CN); Montauk, NY, USA (MT); and Cape May, NJ, USA (CM). Country/province/state indicated as: NOR: Norway; SWE: Sweden; DNK: Denmark; NL: The Netherlands; BEL: Belgium; FRA: France; ESP: Spain; SCT: Scotland; WLS: Wales; ENG: England; IRL: Ireland; QC, CAN: Québec, Canada; NL, CAN: Newfoundland, Canada; NS, CAN: Nova Scotia, Canada; NB, CAN: New Brunswick, Canada; PE, CAN: Prince Edward Island, Canada; ME, USA: Maine, USA; NH, USA: New Hampshire, USA; MA, USA: Massachusetts, USA; CT, USA: Connecticut, USA; NY, USA: New York, USA; NJ, USA: New Jersey, USA.
