# Supplementary material
Source: PubMed Central journal article supplement (PMC2688860)
Supplement: 0812300106_SD2_PDF.pdf [file 0812300106_SD2_PDF.pdf]

**Dataset S2. Complete list of European ports\* of origin for ships sailing to Pictou, Nova Scotia (1773-1861) by period (see Table 3)**

Main ports (>10 ships departing for Pictou in the designated period) are indicated in bold italics.

**1. 1773-1815:**

England: Carlisle, Liverpool, Poole; Scotland: ***Aberdeen***, Ayr, Barra, Cromarty, Fort William, Glasgow, Grangemouth, ***Greenock***, Inverness, Leith, Loch Broom, Loch Laxford, Lochboisdale, Moray Firth, Nairn, Oban, Port Glasgow, Saltcoats, Stornoway, Stromness, Sutherland, The Clyde, Ullapool (Isle Martin), Thurso, Wick

**2. 1816-1827:**

England: Hull, ***Liverpool***, London, ***Newcastle***, Plymouth, Shields, Stockton; Ireland: Belfast, Cork, Dublin, Limerick, Newry; Scotland: ***Aberdeen***, Alloa, Banff, Barra, Canna, Cromarty, Dumfries, Dundee, Fort William, Galloway, Grangemouth, ***Greenock***, Kirkcaldy, ***Leith***, Lochalsh, Lochinver, Oban, Peterhead, Port Glasgow, Saltcoats, Scabster, Stornoway, The Clyde, Tobermory, Thurso; Wales: Beaumaris

**3. 1828-1845:**

England: Berwick, Bristol, Chester, Exeter, Falmouth, ***Hull***, ***Liverpool***, ***London***, ***Newcastle***, Padstow, Plymouth, Poole, Portsmouth, Shields (North Shields), Somerset, Stockbridge, Stockton, ***Sunderland***, Whitby, Yarmouth; Ireland: Belfast, Cork, Dublin, Limerick, Waterford; Scotland: ***Aberdeen***, Argyle, Bownmore, ***Cromarty***, Dundee, Fort William, ***Glasgow***, ***Greenock***, Inverness, Leith, Loch Laxford, Lochmaddy, Nevis, Port Glasgow, Stornoway, Stromness, The Clyde, ***Thurso***, Tobermory, Wick; Wales: Swansea; Europe (exclusive of Britain/Ireland): Amsterdam (The Netherlands), Antwerp (Belgium), the Baltic (locations unknown); Bordeaux (France), Bremen (Germany),

France (location unknown), Havre (France), Marseilles (France), Memel (Lithuania),  
Rotterdam (The Netherlands)

#### **4. 1846-1861**

England: Bristol, Falmouth, Hull, *Liverpool*, *London*, Newcastle, Portsmouth,  
Sunderland, Yarmouth; Ireland: Belfast, Cork, Dublin, Limerick, Sligo, Waterford,  
Whitehead, Wicklow; Scotland: Cromarty, *Glasgow*, Greenock, Loch Laxford, The  
Clyde, Thurso; Wales: Newport; Europe (exclusive of Britain/Ireland): Havre (France)

\* Locations are reported exactly as written in the original sources (Table S3). Some names are redundant (e.g., “Moray Firth” could be Cromarty or a different place along the Moray Firth; “The Clyde” could mean Greenock, Glasgow, Port Glasgow, or a different place along the Firth of Clyde; see *SI Methods*, “Shipping Records” for further commentary).
