# Supplementary material
Source: PubMed Central journal article supplement (PMC2688860)
Supplement: 0812300106_ST1_PDF.pdf [file 0812300106_ST1_PDF.pdf]

**Table S1. Log-likelihood assignment scores for *Fucus serratus* using all sites and following Rannala and Mountain (1)**

| Pictou (Nova Scotia)      |                  |                        | Inverness (Nova Scotia) |                  |                        | Caplin Cove (Nova Scotia) |                  |                        |
|---------------------------|------------------|------------------------|-------------------------|------------------|------------------------|---------------------------|------------------|------------------------|
| Coming from               | Likelihood score | Assignment probability | Coming from             | Likelihood score | Assignment probability | Coming from               | Likelihood score | Assignment probability |
| Galway (Ireland)          | 123.578          | 100.00                 | Greenock (Scotland)     | 137.683          | 100.00                 | Greenock                  | 126.469          | 100.00                 |
| Jersey (Channel Islands)  | 155.36           | 0.0                    | Bangor                  | 158.188          | 0.0                    | Oban                      | 145.879          | 0.0                    |
| Pl. du Lividie (France)   | 163.998          |                        | Oban                    | 173.527          |                        | Bangor                    | 147.702          |                        |
| I'lle de Siec (France)    | 172.846          |                        | Jersey                  | 180.966          |                        | Plymouth                  | 159.573          |                        |
| Bangor (Northern Ireland) | 172.946          |                        | Fort William            | 193.135          |                        | Fort William              | 169.37           |                        |
| Oban (Scotland)           | 174.277          |                        | Plymouth                | 205.971          |                        | Jersey (E)                | 170.866          |                        |
| Greenock (Scotland)       | 174.949          |                        | I'lle de Siec           | 208.292          |                        | Pl. du Lividie            | 185.795          |                        |
| Roscoff (France)          | 178.2            |                        | Galway                  | 211.901          |                        | Galway                    | 198.66           |                        |
| Plymouth (Wales)          | 183.446          |                        | Pl. du Lividie          | 214.133          |                        | Cromarty                  | 199.815          |                        |
| Limerick (Ireland)        | 194.612          |                        | Roscoff                 | 216.325          |                        | I'lle de Siec             | 206.871          |                        |
| Fort William (Scotland)   | 200.862          |                        | Cromarty                | 222.678          |                        | Sligo                     | 211.783          |                        |
| Cromarty (Scotland)       | 202.434          |                        | Rousay                  | 226.023          |                        | Rousay                    | 212.572          |                        |
| Rousay, Orkney (Scotland) | 213.705          |                        | Sligo                   | 252.498          |                        | Roscoff                   | 214.671          |                        |
| Peterhead (Scotland)      | 240.032          |                        | Peterhead               | 277.596          |                        | Wexford                   | 236.639          |                        |
| Sligo (Ireland)           | 241.206          |                        | Ålesund                 | 280.488          |                        | Peterhead                 | 239.599          |                        |

|                                              |         |                       |         |                       |         |
|----------------------------------------------|---------|-----------------------|---------|-----------------------|---------|
| Trondheim<br>(Norway)                        | 241.323 | St Valerie<br>en Caux | 282.178 | Bodø (N)              | 244.357 |
| Ålesund<br>(Norway)                          | 249.25  | Wexford               | 287.148 | St Valerie<br>en Caux | 246.362 |
| Bodø (Norway)                                | 262.96  | Trondheim             | 293.264 | Ålesund               | 253.303 |
| Giant's<br>Causeway<br>(Northern<br>Ireland) | 265.497 | Reykjavik             | 312.605 | Trondheim             | 269.463 |
| Gjerrild Klint<br>(Denmark)                  | 266.047 | Smaskjaer             | 313.803 | Giant's<br>Causeway   | 272.907 |
| Smaskjaer<br>(Norway)                        | 271.318 | Bodø                  | 314.724 | Gjerrild<br>Klint     | 274.579 |
| Wexford<br>(Ireland)                         | 276.735 | Gjerrild<br>Klint     | 317.113 | Limerick              | 281.464 |
| Bergen<br>(Norway)                           | 278.915 | Limerick              | 318.127 | Smaskjaer             | 286.401 |
| Reykjavik<br>(Iceland)                       | 282.993 | Giant's<br>Causeway   | 327.249 | Reykjavik             | 290.016 |
| Karlshamn<br>(Sweden)                        | 287.91  | Nyborg                | 345.765 | Nyborg                | 300.289 |
| St Valerie en<br>Caux (France)               | 297.278 | Suduroy               | 346.917 | Karlshamn             | 301.978 |
| Suduroy<br>(Faroes)                          | 304.694 | Karlshamn             | 361.891 | Suduroy               | 305.02  |
| Nyborg<br>(Norway)                           | 319.854 | Bergen                | 362.995 | Bergen                | 318.651 |

1. Rannala B, Mountain JL (1997) Detecting immigration by using multilocus genotypes. *Proc Natl Acad Sci USA* 94: 9197--9201
