# Supplementary material
Source: PubMed Central journal article supplement (PMC2688860)
Supplement: 0812300106_ST2_PDF.pdf [file 0812300106_ST2_PDF.pdf]

**Table S2. Sampling sites and average allelic diversity (A) for *Fucus serratus* over 7 microsatellite loci, corrected for sample size**

| Locality                          | A    |
|-----------------------------------|------|
| Norway                            |      |
| Bodø                              | 4.1  |
| Ålesund                           | 7.0  |
| Trondheim                         | 7.4  |
| Nyborg                            | 4.3  |
| Bergen                            | 8.9  |
| Smaskjaer                         | 8.7  |
| Sweden                            |      |
| Karlshamn                         | 5.6  |
| Denmark                           |      |
| Gjerrild Klint                    | 8.6  |
| France (Brittany)                 |      |
| I'lle de Siec                     | 18.4 |
| Pl. du Lividie                    | 20.7 |
| Roscoff                           | 19.4 |
| England                           |      |
| Plymouth                          | 12.1 |
| Channel Islands/France (Normandy) |      |
| Jersey                            | 14.8 |
| St. Valerie en Caux               | 4.6  |
| Ireland                           |      |
| Limerick                          | 7.6  |
| Galway                            | 9.6  |
| Sligo                             | 7.5  |
| Wexford                           | 7.1  |
| Bangor                            | 11.1 |
| Giant's Causeway                  | 7.3  |
| Scotland                          |      |
| Oban                              | 10.1 |
| Fort William                      | 10.4 |
| Greenock                          | 9.6  |
| Cromarty                          | 8.6  |
| Peterhead                         | 6.8  |
| Orkney                            | 11.3 |
| Iceland                           | 4.1  |
| Faroes                            | 2.9  |
| Canada (Nova Scotia)              |      |
| Pictou                            | 9.6  |
| Inverness                         | 7.4  |
| Caplin Cove                       | 5.1  |
