# Supplementary material
Source: PubMed Central journal article supplement (PMC2688860)
Supplement: 0812300106_ST3_PDF.pdf [file 0812300106_ST3_PDF.pdf]

**Table S3. Records of 882 ships from European ports to Pictou (1773-1861)**

| Year             | Ship name                    | Arrived from             | Source (see <i>Materials and Methods</i> )* |
|------------------|------------------------------|--------------------------|---------------------------------------------|
| <b>1773-1815</b> |                              |                          |                                             |
| 1806             | <i>Speculation</i>           | Aberdeen                 | Dobson, 1998                                |
| 1811             | <i>Ploughman</i>             | Aberdeen                 | Campey, Appendix II; Dobson, 2004, p. 88    |
| 1812             | <i>Ploughman</i>             | Aberdeen                 | Campey, Appendix II; Dobson, 2004, p.88     |
| 1813             | <i>Centurion</i>             | Aberdeen                 | Dobson, 1998, p.23                          |
| 1814             | <i>Cambria</i>               | Aberdeen                 | RG31-104,v9,n4; Dobson, 1998, p20           |
| 1814             | <i>Halifax Packet</i>        | Aberdeen                 | Dobson, 1998, p. 53                         |
| 1814             | <i>Mary</i>                  | Aberdeen                 | Dobson, 1998, p. 83 (depart: April)         |
| 1814             | <i>Mary</i>                  | Aberdeen                 | Dobson, 1998, p. 83 (depart: August)        |
| 1815             | <i>Admiral Nelson</i>        | Aberdeen                 | Dobson, 1998, p. 2                          |
| 1815             | <i>Fame</i>                  | Aberdeen                 | Dobson, 1998, p. 43                         |
| 1815             | <i>Halifax Packet</i>        | Aberdeen                 | Dobson, 1998, p. 53                         |
| 1815             | <i>Mary</i>                  | Aberdeen                 | Dobson, 1998, p. 83                         |
| 1815             | <i>Ploughman</i>             | Aberdeen                 | Dobson, 1998, p. 100                        |
| 1815             | <i>Ruby of Aberdeen</i>      | Aberdeen                 | Dobson, 1998, p. 109                        |
| 1815             | <i>William</i>               | Aberdeen                 | Dobson, 1998, p. 125                        |
| 1815             | <i>Glentanner</i>            | Aberdeen (via Halifax)   | Campey, Appendix II                         |
| 1806             | <i>Hope of Ayr</i>           | Ayr                      | Dobson, 2002, p.75                          |
| 1806             | <i>Lucy of Ayr</i>           | Ayr                      | Dobson, 2002, p. 102                        |
| 1802             | <i>Unknown Name A</i>        | Barra                    | Patterson                                   |
| 1807             | <i>Witch of the Waves</i>    | Carlisle                 | Dobson, 2004                                |
| 1815             | <i>Prince William</i>        | Cromarty                 | Campey, Appendix II                         |
| 1814             | <i>Perseverance</i>          | Cromarty, Wick, Aberdeen | Campey, Appendix II; Dobson, 1998, p. 98    |
| 1801             | <i>Alexander</i>             | Fort William             | Campey, Appendix II                         |
| 1801             | <i>Dove</i>                  | Fort William             | Campey, Appendix II; Dobson, 1998, p. 34    |
| 1801             | <i>Good Intent</i>           | Fort William             | Campey, Appendix II                         |
| 1801             | <i>Nora</i>                  | Fort William             | Campey, Appendix II; Dobson, 1998, p. 93    |
| 1801             | <i>Sarah</i>                 | Fort William             | Campey, Appendix II; Dobson, 1998, p. 111   |
| 1807             | <i>Active</i>                | Fort William             | NAS E.504/12/6; Dobson, 2002, p.1           |
| 1789             | <i>Salton</i>                | Glasgow                  | Dobson, 2002, p. 148                        |
| 1791             | <i>Dunkenfield</i>           | Glasgow                  | Campey, Appendix II                         |
| 1803             | <i>Diana of Glasgow</i>      | Glasgow                  | Dobson, 1998, p. 32                         |
| 1803             | <i>Hebe</i>                  | Grangemouth              | Dobson, 1998, p. 56                         |
| 1786             | <i>Lilly</i>                 | Greenock                 | Dobson, 1998, p. 73                         |
| 1788             | <i>Elizabeth of Greenock</i> | Greenock                 | Dobson, 2002, p. 51                         |
| 1789             | <i>Peggy of Grennock</i>     | Greenock                 | Dobson, 2002, p. 131                        |
| 1803             | <i>Wentworth</i>             | Greenock                 | Dobson, 1998, p. 125                        |
| 1804             | <i>Caledonia</i>             | Greenock                 | Dobson, 1998, p. 20                         |
| 1804             | <i>Nancy</i>                 | Greenock                 | Dobson, 1998, p. 91                         |

|      |                               |                         |                                           |
|------|-------------------------------|-------------------------|-------------------------------------------|
| 1806 | <i>Pallas</i>                 | Greenock                | Campey, Appendix II                       |
| 1811 | <i>Amphredite</i> of Halifax  | Greenock                | Dobson, 2002, p. 7                        |
| 1812 | <i>Grace</i> of Arbroath      | Greenock                | Dobson, 2002, p. 67                       |
| 1812 | <i>Lord Collingwood</i>       | Greenock                | Dobson, 2002, p. 99                       |
| 1813 | <i>Charleston</i> of Halifax  | Greenock                | Dobson, 2002, p.32                        |
| 1813 | <i>Minerva</i> of Greenock    | Greenock                | Dobson, 2002, p. 115                      |
| 1815 | <i>Lord Gardiner</i>          | Greenock                | Dobson, 2002, p. 99                       |
| 1802 | <i>Aurora</i>                 | Greenock, Fort William  | Campey, Appendix II; Dobson, 1998, p. 12  |
| 1773 | <i>Hector</i>                 | Greenock, Loch Broom    | Patterson; Campey, Appendix II            |
| 1812 | <i>Albuera</i> of Aberdeen    | Inverness               | Dobson, 2002, p. 4                        |
| 1815 | <i>Helen</i> of Aberdeen      | Inverness               | Dobson, 2002, p. 71                       |
| 1815 | <i>Helmsley</i> of Sunderland | Inverness               | Dobson, 2002, p. 72                       |
| 1815 | <i>Mary</i> of Aberdeen       | Inverness               | Dobson, 2002, p. 109                      |
| 1805 | <i>Rebecca and Sarah</i>      | Leith                   | Dobson, 2002, p. 140                      |
| 1809 | <i>Helen</i>                  | Leith                   | Dobson, 1998, p. 57                       |
| 1804 | <i>North Star</i>             | Leith, Greenock         | Dobson, 1998, p. 93                       |
| 1814 | <i>Jane H. Lonsdale</i>       | Liverpool               | RG31-104,v9,n3                            |
| 1815 | <i>Ellen</i>                  | Loch Laxford            | Dobson, 1998, p. 40                       |
| 1802 | <i>Unknown name B</i>         | Lochboisdale            | Campey, Appendix II                       |
| 1802 | <i>Unknown name C</i>         | Lochboisdale            | Campey, Appendix II                       |
| 1803 | <i>Unknown name D</i>         | Moray Firth             | Campey, Appendix II                       |
| 1803 | <i>Unknown name E</i>         | Moray Firth             | Campey, Appendix II                       |
| 1803 | <i>Unknown name F</i>         | Moray Firth             | Campey, Appendix II                       |
| 1803 | <i>Unknown name G</i>         | Moray Firth             | Campey, Appendix II                       |
| 1806 | <i>Sprightly</i>              | Nairn                   | Dobson, p. 115,1998                       |
| 1810 | <i>Favourite</i>              | Oban                    | Campey, Appendix II                       |
| 1814 | <i>Alert</i>                  | Poole                   | RG31-104,v9,n3                            |
| 1802 | <i>Eliza</i>                  | Port Glasgow            | Dobson, 2002, p. 49                       |
| 1803 | <i>Commerce</i>               | Port Glasgow            | Campey, Appendix II; Dobson, 1998, p. 27  |
| 1803 | <i>Charlotte</i>              | Saltcoats               | Dobson, 1998, p. 24                       |
| 1804 | <i>Eliza</i>                  | Saltcoats               | Dobson, 1998                              |
| 1804 | <i>Grafton</i>                | Saltcoats               | Dobson, 1998                              |
| 1804 | <i>Helen</i>                  | Saltcoats               | Dobson, 1998                              |
| 1789 | <i>Salton</i>                 | Scotland (unknown site) | <u>Dobson, 2002</u>                       |
| 1803 | <i>Unknown name H</i>         | Scotland (unknown site) | Campey, Appendix II                       |
| 1803 | <i>Unknown name I</i>         | Scotland (unknown site) | Campey, Appendix II                       |
| 1812 | <i>Anne</i> of North Shields  | Stornoway               | Dobson, Vol. 2                            |
| 1815 | <i>Three Brothers</i>         | Stornoway               | Dobson, Vol. 2                            |
| 1803 | <i>Alexander</i>              | Stornoway               | Campey, Appendix II, Dobson 1998, p. 5    |
| 1803 | <i>Unknown name J</i>         | Stornoway               | Campey, Appendix II                       |
| 1803 | <i>Unknown Name K</i>         | Stornoway               | Campey, Appendix II                       |
| 1805 | <i>Sir Sydney Smith</i>       | Stornoway               | Campey, Appendix II; Dobson, 1998, p. 113 |
| 1811 | <i>Anne</i> of North Shields  | Stornoway               | Campey, Appendix II; Dobson, 2002, p.     |

|                  |                               |                        | 10                                            |
|------------------|-------------------------------|------------------------|-----------------------------------------------|
| 1807             | <i>Rambler</i>                | Stromness, Thurso      | Campey, Appendix II                           |
| 1803             | <i>Nelly Morrison</i>         | Sutherland             | Dobson, 1998, p. 91                           |
| 1792             | <i>Susanna</i>                | The Clyde              | Dobson, 1998?                                 |
| 1803             | <i>Albion</i>                 | The Clyde              | Dobson, 1998, p. 4                            |
| 1803             | <i>Hebe</i>                   | The Clyde              | Dobson, 1998, p. 56                           |
| 1801             | <i>Hope of Lossiemouth</i>    | Ullapool (Isle Martin) | Campey, Appendix II                           |
| 1802             | <i>Tweed</i>                  | Ullapool (Isle Martin) | Campey, Appendix II; Dobson, 1998, p. 121     |
| 1803             | <i>Favourite of Kirkcaldy</i> | Ullapool (Isle Martin) | Campey, Appendix II; Dobson, 1998, p. 44      |
| <b>1816-1827</b> |                               |                        |                                               |
| 1816             | <i>Cambria</i>                | Aberdeen               | Dobson, 1998, p. 21; Campey, App. II          |
| 1816             | <i>Good Intent</i>            | Aberdeen               | Campey, Appendix II                           |
| 1816             | <i>Lion of Aberdeen</i>       | Aberdeen               | Dobson, 2002, p. 98                           |
| 1816             | <i>Sprightly</i>              | Aberdeen               | Campey, Appendix II; Dobson, 1998, p. 115     |
| 1817             | <i>Augusta</i>                | Aberdeen               | Campey, Appendix II                           |
| 1817             | <i>Carolina</i>               | Aberdeen               | Dobson, 1998, p. 22                           |
| 1817             | <i>Earl of Dalhousie</i>      | Aberdeen               | Dobson, 1998, p. 36                           |
| 1817             | <i>Good Intent</i>            | Aberdeen               | RG31-104,v9,n16, arrived May; Campey, App. II |
| 1817             | <i>Good Intent</i>            | Aberdeen               | RG31-104,v9,n16, arrived August               |
| 1817             | <i>Harmony</i>                | Aberdeen               | Dobson, 1998, p. 55                           |
| 1818             | <i>Aimwell</i>                | Aberdeen               | Dobson, 1998, p. 3                            |
| 1818             | <i>Alfred</i>                 | Aberdeen               | Dobson, 2002, p. 6                            |
| 1818             | <i>Good Intent</i>            | Aberdeen               | Dobson, 1998, p. 52; May                      |
| 1818             | <i>Good Intent</i>            | Aberdeen               | Dobson, 1998, p. 52; August                   |
| 1818             | <i>Perseverance</i>           | Aberdeen               | Dobson, 1998, p. 98                           |
| 1818             | <i>Sprightly</i>              | Aberdeen               | Dobson, 1998, p. 115                          |
| 1819             | <i>Alexander</i>              | Aberdeen               | Dobson, 1998, p. 6                            |
| 1819             | <i>Cyrus</i>                  | Aberdeen               | Dobson, 1998, p. 30                           |
| 1819             | <i>Douglas</i>                | Aberdeen               | Dobson, 1998, p. 34                           |
| 1819             | <i>Good Intent</i>            | Aberdeen               | Dobson, 1998, p. 52                           |
| 1819             | <i>Isabella</i>               | Aberdeen               | Dobson, 1998, p. 63                           |
| 1819             | <i>Norval</i>                 | Aberdeen               | Dobson, 1998, p. 94                           |
| 1819             | <i>Perseverance</i>           | Aberdeen               | Dobson, 2002, p. 132                          |
| 1820             | <i>Aimwell</i>                | Aberdeen               | Dobson, 1998, p.3                             |
| 1820             | <i>Ceres</i>                  | Aberdeen               | Dobson, 1998, p. 23                           |
| 1820             | <i>Good Intent</i>            | Aberdeen               | Dobson, 1998, p. 52                           |
| 1820             | <i>Harmony</i>                | Aberdeen               | Dobson, 1998, p. 55; RG 31-104v10n11          |
| 1820             | <i>Highlander</i>             | Aberdeen               | Dobson, 1998, p. 59                           |
| 1820             | <i>Isabella</i>               | Aberdeen               | Dobson, 1998, p. 63                           |
| 1820             | <i>Louisa</i>                 | Aberdeen               | Dobson, 1998, p. 75                           |
| 1820             | <i>Perseverance</i>           | Aberdeen               | Dobson, 1998, p. 98                           |
| 1821             | <i>Aimwell</i>                | Aberdeen               | Dobson, 1998, p. 3                            |

|      |                            |                               |                                           |
|------|----------------------------|-------------------------------|-------------------------------------------|
| 1821 | <i>Louisa</i>              | Aberdeen                      | RG31-104,v10, n7; Dobson, 1998, p. 75     |
| 1821 | <i>St. Nicholas</i>        | Aberdeen                      | RG31-104,v10, n7                          |
| 1821 | <i>St. Nicolas</i>         | Aberdeen                      | RG31-104,v10, n8                          |
| 1821 | <i>William</i>             | Aberdeen                      | RG31-104,v10, n6; Dobson, 1998, p. 125    |
| 1822 | <i>Hope</i>                | Aberdeen                      | Dobson, 1998, p. 60                       |
| 1822 | <i>Louisa</i>              | Aberdeen                      | RG31-104,v10, n10; Dobson, 1998, p. 75    |
| 1822 | <i>Louisa</i>              | Aberdeen                      | RG31-104,v10, n11                         |
| 1823 | <i>Douglas</i>             | Aberdeen                      | RG31-104,v10, n15                         |
| 1823 | <i>Fancy</i>               | Aberdeen                      | RG31-104,v10, n15                         |
| 1823 | <i>Louisa</i>              | Aberdeen                      | RG31-104,v10, n15                         |
| 1823 | <i>Louisa</i>              | Aberdeen                      | RG31-104,v10, n19                         |
| 1825 | <i>Aberdeenshire</i>       | Aberdeen                      | NS 9-28-25                                |
| 1825 | <i>Aberdeenshire</i>       | Aberdeen                      | Dobson, 1998, p. 1                        |
| 1825 | <i>Caledonian</i>          | Aberdeen                      | NS 10-19-25                               |
| 1825 | <i>Christie &amp; Jane</i> | Aberdeen                      | NS 9-28-25                                |
| 1825 | <i>Fancy</i>               | Aberdeen                      | NS 7-14-25                                |
| 1825 | <i>Louisa</i>              | Aberdeen                      | Dobson, 2002, p. 75                       |
| 1826 | <i>Louisa</i>              | Aberdeen                      | NS 5-18-26                                |
| 1826 | <i>Robert</i>              | Aberdeen                      | NS 9-21-26                                |
| 1827 | <i>Aberdeenshire</i>       | Aberdeen                      | NS 10-4-27, Dobson, 1998, p.1             |
| 1827 | <i>Diadem</i>              | Aberdeen                      | Dobson, 1998, p. 32; depart: March        |
| 1827 | <i>Diadem</i>              | Aberdeen                      | Dobson, 1998, p. 32; depart: July         |
| 1829 | <i>Albion</i>              | Aberdeen                      | Dobson, 1998, p. 4                        |
| 1816 | <i>Louisa</i>              | Aberdeen (via Halifax)        | Dobson, 1998, p. 75; Campey, App. II      |
| 1816 | <i>Ploughman</i>           | Aberdeen (via Halifax)        | Campey, Appendix II; Dobson, 1998, p. 100 |
| 1820 | <i>Bruce</i>               | Aberdeen, Cromarty, Scabster  | Dobson, 1998, p. 19                       |
| 1819 | <i>Caledonia</i>           | Alloa, Greenock (via Halifax) | Campey, Appendix II                       |
| 1818 | <i>Daphne</i>              | Banff                         | Dobson, 1998, p. 31                       |
| 1825 | <i>Idas</i>                | Beaumaris                     | NS 11-7-25                                |
| 1825 | <i>Lucretia</i>            | Belfast                       | NS 9-14-25                                |
| 1826 | <i>Aid</i>                 | Belfast                       | NS 8-24-26                                |
| 1826 | <i>Hopewell</i>            | Belfast                       | NS 7-13-26                                |
| 1829 | <i>Hero</i>                | Belfast                       | CP 10-14-29                               |
| 1819 | <i>Victory</i>             | Canna?                        | Campey, Appendix II                       |
| 1822 | <i>Sarah</i>               | Cork                          | RG31-104,v10, n10                         |
| 1825 | <i>Henry Arnott</i>        | Cork                          | NS 9-14-25                                |
| 1819 | <i>Ann</i>                 | Cromarty                      | Dobson, 1998, p. 10                       |
| 1819 | <i>Diana</i>               | Cromarty                      | Dobson, 1998, p. 32                       |
| 1822 | <i>Harmony</i>             | Cromarty                      | Campey, Appendix II; Dobson, 1998, p. 55  |
| 1822 | <i>Ruby</i>                | Cromarty                      | Campey, Appendix II; Dobson, 1998, p. 109 |
| 1821 | <i>Ossian</i>              | Cromarty                      | RG31-104,v10, n7; Dobson, 2002, p. 126;   |

|      |                               |                    |                                                               |
|------|-------------------------------|--------------------|---------------------------------------------------------------|
| 1816 | <i>Vine of Peterhead</i>      | Cromarty, Thurso   | Campey, Appd. II<br>Campey, Appendix II; Dobson, 1998, p. 124 |
| 1826 | <i>Richard</i>                | Dublin             | NS 8-17-26                                                    |
| 1829 | <i>Sir J. H. Craig</i>        | Dublin             | CP 5-20-29                                                    |
| 1816 | <i>Lovely Mary</i>            | Dumfries           | Campey, Appendix II                                           |
| 1817 | <i>Augusta</i>                | Dumfries           | RG31-104,v9,n16; Dobson, 1998, p. 12                          |
| 1817 | <i>Catherine</i>              | Dumfries           | Dobson, Vol. 1; Campey, Appendix II                           |
| 1817 | <i>General Goldie</i>         | Dumfries           | Campey, Appendix II                                           |
| 1818 | <i>Augusta</i>                | Dumfries           | Campey, Appendix II                                           |
| 1818 | <i>Lovely Mary</i>            | Dumfries           | Campey, Appendix II                                           |
| 1822 | <i>Thompson's Packet</i>      | Dumfries           | Campey, Appendix II                                           |
| 1822 | <i>Thomson Vachiel</i>        | Dumfries           | RG31-104,v10, n10                                             |
| 1821 | <i>Thompson's Packet</i>      | Dumfries (via PEI) | Campey, Appendix II; Dobson, 1998, p. 119                     |
| 1817 | <i>John Dearness</i>          | Dundee             | RG31-104,v9,n16                                               |
| 1819 | <i>Venerable</i>              | Dundee             | Dobson, 2002, p. 162                                          |
| 1816 | <i>Tartar</i>                 | Dundee, Tobermory  | Campey, Appendix II                                           |
| 1816 | <i>Good Intent</i>            | Fort William       | Campey, Appendix II; NAS E.504/12/6                           |
| 1816 | <i>Nymph</i>                  | Fort William       | Campey Appdx. II; Dobson 2002,p.125;<br>NAS E.504/12/6        |
| 1817 | <i>Frances Ann</i>            | Fort William       | Dobson, 2002, p. 59; Campey, Appd. II                         |
| 1818 | <i>Bassettere</i>             | Fort William       | NAS E.504/12/6; Campey, Appd. II                              |
| 1826 | <i>Ophelia</i>                | Galloway           | NS 9-21-26                                                    |
| 1826 | <i>Malvina</i>                | Grangemouth        | NS 5-25-26                                                    |
| 1816 | <i>Lord Gardner</i>           | Greenock           | Dobson, 2002, p. 99 (second trip)                             |
| 1817 | <i>Mary</i>                   | Greenock           | RG31-104,v9,n16                                               |
| 1818 | <i>Caesar</i>                 | Greenock           | Dobson, 2002, p. 27                                           |
| 1818 | <i>Harmony of Aberdeen</i>    | Greenock           | Dobson, 1998, p. 55                                           |
| 1819 | <i>Elizabeth of Newcastle</i> | Greenock           | Dobson, 2002, p. 52                                           |
| 1819 | <i>Sisters</i>                | Greenock           | Dobson, 1998, p. 114                                          |
| 1820 | <i>Alexander</i>              | Greenock           | Dobson, 1998, p. 6                                            |
| 1820 | <i>Union</i>                  | Greenock           | Dobson, 2002, p. 161                                          |
| 1821 | <i>Alexis</i>                 | Greenock           | RG31-104,v10, n7; Dobson, 2002, p. 5                          |
| 1822 | <i>Commerce</i>               | Greenock           | RG31-104,v10, n11                                             |
| 1822 | <i>Union</i>                  | Greenock           | RG31-104,v10, n10;Campey,Appdx II;Dobson,2002,p.161           |
| 1823 | <i>Sarah</i>                  | Greenock           | RG31-104,v10, n15                                             |
| 1823 | <i>Susanna</i>                | Greenock           | RG31-104,v10, n15                                             |
| 1823 | <i>Susannah</i>               | Greenock           | RG31-104,v10, n14                                             |
| 1823 | <i>Thetis</i>                 | Greenock           | RG31-104,v10, n14                                             |
| 1824 | <i>Mercator</i>               | Greenock           | RG31-104,v10, n18                                             |
| 1824 | <i>Mercator</i>               | Greenock           | RG31-104,v10, n20                                             |
| 1824 | <i>Sarah</i>                  | Greenock           | RG31-104,v10, n19                                             |
| 1825 | <i>True</i>                   | Greenock           | NS 10-19-25                                                   |
| 1826 | <i>Mercator</i>               | Greenock           | NS 6-1-26                                                     |

|      |                            |                        |                                           |
|------|----------------------------|------------------------|-------------------------------------------|
| 1826 | <i>Thetis</i>              | Greenock               | NS 5-25-26; Campey, Appendix II           |
| 1826 | <i>Thetis</i>              | Greenock               | NS 10-12-26; Campey, Appendix II          |
| 1826 | <i>Warrior</i>             | Greenock               | NS 10-12-26                               |
| 1827 | <i>Thetis</i>              | Greenock               | NS 10-4-27                                |
| 1816 | <i>Lord Gardner</i>        | Greenock (via Halifax) | Campey, Appendix II; Dobson, 2002, p. 99  |
| 1817 | <i>William Tell</i>        | Greenock, Barra        | Campey, Appendix II; Dobson, 1998, p. 126 |
| 1818 | <i>Bassettere</i>          | Greenock, Fort William | Campey, Appendix II                       |
| 1825 | <i>Jane &amp; Margaret</i> | Hull                   | NS 9-14-25                                |
| 1826 | <i>Elizabeth-Anne</i>      | Hull                   | NS 6-1-26                                 |
| 1826 | <i>Friends</i>             | Hull                   | NS 6-1-26                                 |
| 1826 | <i>Stephen</i>             | Hull                   | NS 5-25-26                                |
| 1826 | <i>Urania</i>              | Hull                   | NS 7-6-26                                 |
| 1826 | <i>William Penn</i>        | Hull                   | NS 6-1-26                                 |
| 1826 | <i>Zephyr</i>              | Hull                   | NS 5-25-26                                |
| 1827 | <i>Mary</i>                | Hull                   | NS 8-16-27                                |
| 1827 | <i>Vigilent</i>            | Hull                   | NS 8-16-27                                |
| 1829 | <i>Traveller</i>           | Kirkcaldy?             | CP 5-20-29                                |
| 1818 | <i>Mary</i>                | Leith                  | Dobson, 1998, p. 84                       |
| 1819 | <i>Simon Cock</i>          | Leith                  | Dobson, 2002, p. 150                      |
| 1820 | <i>Diligence</i>           | Leith                  | Dobson, 1998, p. 33                       |
| 1820 | <i>Margaret</i>            | Leith                  | Dobson, 1998, p. 79                       |
| 1820 | <i>Mary of Leith</i>       | Leith                  | Dobson, 2002, p. 109                      |
| 1821 | <i>Mary</i>                | Leith                  | Dobson, 1998, p. 84                       |
| 1822 | <i>Mary</i>                | Leith                  | Dobson, 1998, p. 84                       |
| 1823 | <i>Cypress</i>             | Leith                  | RG31-104,v10, n14; Dobson, 1998, p. 30    |
| 1823 | <i>Sisters</i>             | Leith                  | Dobson, 1998, p. 114                      |
| 1824 | <i>Cypress</i>             | Leith                  | Dobson, 1998, p. 30                       |
| 1826 | <i>Charles</i>             | Leith                  | NS 7-6-26                                 |
| 1816 | <i>Aurora</i>              | Leith (via Halifax)    | Dobson, 1998, p. 13; Campey, Appendix II  |
| 1821 | <i>Diligence</i>           | Leith, Cromarty        | Dobson, 1998, p. 33                       |
| 1816 | <i>Three Brothers</i>      | Leith, Stornoway       | Campey, Appendix II; Dobson, 2002, p. 157 |
| 1817 | <i>Ann</i>                 | Limerick               | RG31-104,v9,n16                           |
| 1825 | <i>Evans</i>               | Limerick               | NS 9-14-25                                |
| 1825 | <i>Zephyr</i>              | Limerick               | NS 9-14-25                                |
| 1817 | <i>Hornet</i>              | Liverpool              | RG31-104,v9,n16                           |
| 1821 | <i>Enterprize</i>          | Liverpool              | RG31-104,v10, n8                          |
| 1821 | <i>Lady Sherbrooke</i>     | Liverpool              | RG31-104,v10, n6                          |
| 1822 | <i>Croistwaite</i>         | Liverpool              | RG31-104,v10, n11                         |
| 1822 | <i>Enterprize</i>          | Liverpool              | RG31-104,v10, n10                         |
| 1822 | <i>Enterprize</i>          | Liverpool              | RG31-104,v10, n11                         |
| 1822 | <i>Enterprize</i>          | Liverpool              | RG31-104,v10, n12                         |
| 1822 | <i>Harp</i>                | Liverpool              | RG31-104,v10, n10                         |

---

|      |                              |           |                     |
|------|------------------------------|-----------|---------------------|
| 1822 | <i>Mary Ford</i>             | Liverpool | RG31-104,v10, n10   |
| 1822 | <i>Union</i>                 | Liverpool | RG31-104,v10, n12   |
| 1823 | <i>Enterprize</i>            | Liverpool | RG31-104,v10, n14   |
| 1823 | <i>Enterprize</i>            | Liverpool | RG31-104,v10, n15   |
| 1823 | <i>Lady Sherbrooke</i>       | Liverpool | RG31-104,v10, n14   |
| 1823 | <i>Maid of the Mill</i>      | Liverpool | RG31-104,v10, n15   |
| 1823 | <i>Martha</i>                | Liverpool | RG31-104,v10, n15   |
| 1823 | <i>Mary Ford</i>             | Liverpool | RG31-104,v10, n14   |
| 1823 | <i>Union</i>                 | Liverpool | RG31-104,v10, n15   |
| 1823 | <i>Venerable</i>             | Liverpool | RG31-104,v10, n14   |
| 1824 | <i>Derwent</i>               | Liverpool | RG31-104,v10, n18   |
| 1824 | <i>Dominica</i>              | Liverpool | RG31-104,v10, n19   |
| 1824 | <i>Enterprize</i>            | Liverpool | RG31-104,v10, n18   |
| 1824 | <i>Enterprize</i>            | Liverpool | RG31-104,v10, n20   |
| 1824 | <i>Hayle</i>                 | Liverpool | RG31-104,v10, n20   |
| 1824 | <i>Mary Ford</i>             | Liverpool | RG31-104,v10, n19   |
| 1825 | <i>Henry Arnot</i>           | Liverpool | NS 9-14-25          |
| 1825 | <i>Henry Arnot</i>           | Liverpool | NS 11-7-25          |
| 1825 | <i>Mary Ford</i>             | Liverpool | NS 9-28-25          |
| 1825 | <i>Pandora</i>               | Liverpool | NS 9-14-25          |
| 1825 | <i>Susannah</i>              | Liverpool | NS 10-19-25         |
| 1826 | <i>Ayrshire</i>              | Liverpool | NS 6-1-26           |
| 1826 | <i>David Shaw</i>            | Liverpool | NS 6-1-26           |
| 1826 | <i>Fairfield</i>             | Liverpool | NS 8-17-26          |
| 1826 | <i>Henry Arnot</i>           | Liverpool | NS 5-25-26          |
| 1827 | <i>Ayrshire</i>              | Liverpool | NS 10-18-27         |
| 1827 | <i>Benjamin Shaw</i>         | Liverpool | NS 5-24-27          |
| 1827 | <i>John Craig</i>            | Liverpool | NS 5-24-27          |
| 1827 | <i>Margaret</i>              | Liverpool | NS 6-14-27          |
| 1827 | <i>Mary</i>                  | Liverpool | NS 10-18-27         |
| 1827 | <i>Neptune</i>               | Liverpool | NS 5-24-27          |
| 1827 | <i>Nestor</i>                | Liverpool | NS 5-24-27          |
| 1827 | <i>Royal Edward</i>          | Liverpool | NS 10-4-27          |
| 1827 | <i>Royal Edward</i>          | Liverpool | NS 5-24-27          |
| 1823 | <i>Atlantic</i>              | Lochalsh  | Campey, Appendix II |
| 1818 | <i>Perseverance</i>          | Lochinver | Campey, Appendix II |
| 1823 | <i>Barton</i>                | London    | RG31-104,v10, n14   |
| 1824 | <i>Mary Ann</i>              | London    | RG31-104,v10, n18   |
| 1827 | <i>Stephen</i>               | London    | NS 10-4-27          |
| 1817 | <i>Jessie</i>                | Newcastle | RG31-104,v9,n16     |
| 1822 | <i>Barbara &amp; Mercury</i> | Newcastle | RG31-104,v10, n12   |
| 1823 | <i>Barbara</i>               | Newcastle | RG31-104,v10, n15   |
| 1824 | <i>Barbara</i>               | Newcastle | RG31-104,v10, n19   |
| 1824 | <i>British Union</i>         | Newcastle | RG31-104,v10, n19   |
| 1825 | <i>Barbara</i>               | Newcastle | NS 11-7-25          |
| 1826 | <i>Barbara</i>               | Newcastle | NS 10-19-26         |

---

|                  |                              |                         |                                           |
|------------------|------------------------------|-------------------------|-------------------------------------------|
| 1826             | <i>Elizabeth</i>             | Newcastle               | NS 5-25-26                                |
| 1826             | <i>Elizabeth</i>             | Newcastle               | NS 10-12-26                               |
| 1826             | <i>Stephen</i>               | Newcastle               | NS 9-28-26                                |
| 1827             | <i>Elizabeth</i>             | Newcastle               | NS 5-24-27                                |
| 1827             | <i>Elizabeth</i>             | Newcastle               | NS 10-18-27                               |
| 1827             | <i>Spey</i>                  | Newcastle               | NS 10-4-27                                |
| 1827             | <i>Stephen</i>               | Newcastle               | NS 5-24-27                                |
| 1824             | <i>Lord Wellington</i>       | Newry                   | RG31-104,v10, n20                         |
| 1825             | <i>Lord Wellington</i>       | Newry                   | NS 11-7-25                                |
| 1819             | <i>Speculation</i>           | Oban                    | Campey, Appendix II; Dobson, 1998, p. 115 |
| 1819             | <i>Margaret</i>              | Peterhead               | Dobson, 1998, p. 79                       |
| 1824             | <i>Stephen</i>               | Plymouth                | RG31-104,v10, n19                         |
| 1825             | <i>Malvina</i>               | Port Glasgow            | NS 9-28-25                                |
| 1826             | <i>Friends</i>               | Port Glasgow            | NS 7-6-26                                 |
| 1817             | <i>Baron Ardrossan</i>       | Saltcoats               | Dobson, 1998, p. 13                       |
| 1818             | <i>Anna</i>                  | Saltcoats               | Dobson, 1998, p. 11                       |
| 1826             | <i>James</i>                 | Shields                 | NS 5-18-26                                |
| 1825             | <i>Polly</i>                 | Shields (North Shields) | NS 9-14-25                                |
| 1824             | <i>Ibbetson</i>              | Stockton                | RG31-104,v10, n19                         |
| 1825             | <i>Betsy &amp; Ann</i>       | Stockton                | NS 9-28-25                                |
| 1825             | <i>Ibbetson</i>              | Stockton                | NS 9-28-25                                |
| 1826             | <i>Ibbetson</i>              | Stockton                | NS 5-25-26                                |
| 1826             | <i>Ibbetson</i>              | Stockton                | NS 9-28-26                                |
| 1819             | <i>Mary Ann</i>              | Stornoway               | Dobson, 1998, p. 85                       |
| 1824             | <i>Atlantis</i>              | Stornoway               | RG31-104,v10, n15                         |
| 1817             | <i>Louisa</i>                | The Clyde               | Dobson, 1998, p. 75                       |
| 1825             | <i>Mary</i>                  | The Clyde               | NS 9-14-25                                |
| 1825             | <i>Thetis</i>                | The Clyde               | NS 9-14-25                                |
| 1816             | <i>Tartar</i>                | Tobermory               | Campey, Appendix II                       |
| 1817             | <i>Anacreon of Newcastle</i> | Tobermory               | Campey, App. II; Dobson, 2002, p. 8       |
| 1819             | <i>Economy</i>               | Tobermory               | Campey, Appendix II; Dobson, 1998, p. 48  |
| 1819             | <i>Louisa</i>                | Tobermory               | Campey, Appendix II; Dobson, 2002, p. 100 |
| 1819             | <i>Morningfield</i>          | Tobermory               | Campey, Appendix II; Dobson, 2002, p. 117 |
| 1820             | <i>Dunlop</i>                | Tobermory               | Campey, Appendix II                       |
| <b>1828-1845</b> |                              |                         |                                           |
| 1828             | <i>Aberdeenshire</i>         | Aberdeen                | Dobson, 1998, p. 1                        |
| 1828             | <i>Albion</i>                | Aberdeen                | Dobson, 1998, p. 4                        |
| 1828             | <i>Diadem</i>                | Aberdeen                | Dobson, 1998, p. 32                       |
| 1828             | <i>Diadem</i>                | Aberdeen                | Dobson, 1998, p. 32                       |
| 1829             | <i>Aberdeenshire</i>         | Aberdeen                | Campey, Appd II                           |
| 1830             | <i>Albion</i>                | Aberdeen                | Dobson, 1998, p. 4 (March departure)      |
| 1830             | <i>Albion</i>                | Aberdeen                | Dobson, 1998, p. 4 (July departure)       |



---

|      |                              |                       |                              |
|------|------------------------------|-----------------------|------------------------------|
| 1832 | <i>Aberdeenshire</i>         | Aberdeen              | CP 5-19-32                   |
| 1834 | <i>Aberdeenshire</i>         | Aberdeen              | Dobson, 2000-02              |
| 1834 | <i>Aberdeenshire</i>         | Aberdeen              | Dobson, 2000-02              |
| 1834 | <i>Albion</i>                | Aberdeen              | Dobson, 2000-02              |
| 1845 | <i>Leadbetter</i>            | Aberdeen              | EC 10-8-45                   |
| 1841 | <i>Pacific</i>               | Aberdeen, Thurso      | Campey, App II               |
| 1841 | <i>Universe</i>              | Aberdeen, Thurso      | Campey, App II               |
| 1831 | <i>Thomas Hanford</i>        | Amsterdam             | CP 9-17-31                   |
| 1838 | <i>New Columbia</i>          | Amsterdam             | PO 9-25-38                   |
| 1838 | <i>Trenton</i>               | Antwerp               | PO 10-2-38                   |
| 1840 | <i>Minerva</i>               | Argyle                | PO 6-23-40                   |
| 1830 | <i>Unknown Name L</i>        | Baltic (site unknown) | NS 8-13-30                   |
| 1830 | <i>Unknown Name M</i>        | Baltic (site unknown) | NS 8-13-30                   |
| 1836 | <i>Dante</i>                 | Baltic (site unknown) | NS 10-5-36                   |
| 1826 | <i>Hopewell</i>              | Belfast               | NS 7-13-26                   |
| 1829 | <i>Hero</i>                  | Belfast               | CP 9-9-29                    |
| 1829 | <i>Marchiness of Donegal</i> | Belfast               | CP 5-20-29                   |
| 1832 | <i>Pedestrian</i>            | Belfast               | CP 9-8-32                    |
| 1837 | <i>Lady Ann</i>              | Belfast               | Martell                      |
| 1833 | <i>Good Czar</i>             | Berwick               | NS 10-15-34                  |
| 1840 | <i>Kingston</i>              | Bordeaux              | PO 6-9-40                    |
| 1833 | <i>Charlotte Kerr</i>        | Bownmore              | CP 10-22-33                  |
| 1835 | <i>President</i>             | Bremen                | NS 8-19-35                   |
| 1843 | <i>North Bend</i>            | Bremen                | EC 10-11-43                  |
| 1830 | <i>Friends</i>               | Bristol               | CP 8-14-30                   |
| 1834 | <i>Atticus</i>               | Bristol               | NS 6-18-34                   |
| 1835 | <i>Charlotte</i>             | Bristol               | NS 9-3-35                    |
| 1835 | <i>Enterprise</i>            | Bristol               | NS 9-10-35                   |
| 1836 | <i>Nereus</i>                | Bristol               | NS 9-7-36                    |
| 1836 | <i>Nereus</i>                | Bristol               | NS 7-6-36                    |
| 1838 | <i>Clyde</i>                 | Bristol               | PO 6-26-38                   |
| 1838 | <i>Superior</i>              | Bristol               | RG 31-104 v18, n6; PO 7-3-38 |
| 1828 | <i>Fosset</i>                | Chester               | CP 10-1-28                   |
| 1835 | <i>Bob Logie</i>             | Cork                  | NS 8-19-35                   |
| 1842 | <i>Eclipse</i>               | Cork                  | MF 8-17-42                   |
| 1845 | <i>Perthshire</i>            | Cork                  | EC 5-14-45                   |
| 1831 | <i>Industry</i>              | Cromarty              | Campey, Appd II; CP 9-17-31  |
| 1831 | <i>Lord Brougham</i>         | Cromarty              | Campey, Appd II; CP 9-10-31  |
| 1832 | <i>Blagdon</i>               | Cromarty              | CP 7-28-32; Campey, Appd II  |
| 1832 | <i>Canada</i>                | Cromarty              | Campey, Appd II              |
| 1832 | <i>Sylvanus</i>              | Cromarty              | Campey, Appd II              |
| 1833 | <i>Poland</i>                | Cromarty              | Campey, Appd II              |
| 1833 | <i>Robert &amp; Margaret</i> | Cromarty              | CP 9-3-33; Campey            |
| 1833 | <i>Zephyr</i>                | Cromarty              | Campey, Appd II              |
| 1834 | <i>Chieftan</i>              | Cromarty              | NS 7-16-34; Campey           |
| 1834 | <i>William Henry</i>         | Cromarty              | Campey, Appd II              |

---

|      |                        |                                   |                               |
|------|------------------------|-----------------------------------|-------------------------------|
| 1835 | <i>Paragon</i>         | Cromarty                          | Campey, Appd II; Dobson, 2002 |
| 1833 | <i>Jane Kay</i>        | Cromarty & Thurso                 | Campey, Appd II; CP 7-23-33   |
| 1840 | <i>Osprey</i>          | Cromarty & Thurso                 | Campey, Appd II               |
| 1841 | <i>Lady Grey</i>       | Cromarty & Thurso                 | Campey, App II                |
| 1833 | <i>Jane Key</i>        | Cromarty, Thurso                  | CP 7-23-33, Campey, Appd II   |
| 1842 | <i>Lady Emily</i>      | Cromarty, Thurso, Loch<br>Laxford | Campey, App II                |
| 1842 | <i>Superior</i>        | Cromarty, Thurso                  | MF 6-22-42; Campey, App II    |
| 1829 | <i>Darvin</i>          | Dublin                            | CP 5-20-29                    |
| 1829 | <i>Sir J. H. Craig</i> | Dublin                            | CP 5-20-29                    |
| 1833 | <i>Snow Sophia</i>     | Dublin                            | CP 11-19-33                   |
| 1833 | <i>Industry</i>        | Dundee (via Halifax)              | CP 6-11-43                    |
| 1840 | <i>British King</i>    | Dundee, Cromarty                  | Campey, App II                |
| 1843 | <i>George</i>          | Dundee, Cromarty, Thurso          | Campey, App II                |
| 1832 | <i>Brittania</i>       | Exeter                            | CP 6-16-32                    |
| 1828 | <i>Elizabeth</i>       | Falmouth                          | CP 5-14-28                    |
| 1828 | <i>Stephen</i>         | Falmouth                          | CP 9-10-28                    |
| 1828 | <i>Stephen</i>         | Falmouth                          | CP 5-14-28                    |
| 1829 | <i>Stephen</i>         | Falmouth                          | CP 5-13-29                    |
| 1830 | <i>Barbara</i>         | Falmouth                          | CP 9-17-30                    |
| 1830 | <i>Elizabeth</i>       | Falmouth                          | CP 5-29-30                    |
| 1831 | <i>Elizabeth</i>       | Falmouth                          | CP 9-24-31                    |
| 1831 | <i>Ordend</i>          | Falmouth                          | CP 5-23-31                    |
| 1832 | <i>Barbara</i>         | Falmouth                          | CP 10-20-32                   |
| 1832 | <i>Domus</i>           | Falmouth                          | CP 5-23-32                    |
| 1832 | <i>Elizabeth</i>       | Falmouth                          | CP 5-12-32                    |
| 1838 | <i>Stephen</i>         | Falmouth                          | PO 10-30-38                   |
| 1840 | <i>Harvest Home</i>    | Falmouth                          | PO 5-12-40                    |
| 1843 | <i>Jane</i>            | Falmouth                          | EC 10-4-43                    |
| 1844 | <i>Woodbine</i>        | Falmouth                          | EC 5-22-1844                  |
| 1845 | <i>Harvest Home</i>    | Falmouth                          | EC 9-3-45                     |
| 1828 | <i>Carolina</i>        | Fort William                      | CP 6-4-28                     |
| 1845 | <i>Virgil</i>          | France (port unspecified)         | EC 6-25-45                    |
| 1833 | <i>Charles Hockin</i>  | Glasgow                           | Campey, Appd II               |
| 1833 | <i>Charlotte Kerr</i>  | Glasgow                           | CP 6-18-33; Campey, Appd. II  |
| 1839 | <i>Indus</i>           | Glasgow                           | Dobson, 2002                  |
| 1841 | <i>Stillman</i>        | Glasgow                           | Dobson, 2002                  |
| 1842 | <i>Cleostratus</i>     | Glasgow                           | MF 6-29-42, Campey Appd. II   |
| 1842 | <i>Eagle</i>           | Glasgow                           | MF 9-14-42                    |
| 1842 | <i>Isabella</i>        | Glasgow                           | Campey, App II                |
| 1843 | <i>Hector</i>          | Glasgow                           | PANS microf 221, v4,n46       |
| 1844 | <i>Egerton</i>         | Glasgow                           | EC 5-22-44                    |
| 1844 | <i>Egerton</i>         | Glasgow                           | EC 9-4-44                     |
| 1844 | <i>Sesostris</i>       | Glasgow                           | EC 11-6-44                    |
| 1845 | <i>Aberfoyle</i>       | Glasgow                           | EC 10-1-45                    |
| 1845 | <i>Czar</i>            | Glasgow                           | EC 5-21-45                    |

|      |                        |                     |                                                          |
|------|------------------------|---------------------|----------------------------------------------------------|
| 1845 | <i>Hyndeford</i>       | Glasgow             | EC 11-5-45                                               |
| 1845 | <i>London</i>          | Glasgow             | EC 8-20-45                                               |
| 1845 | <i>Origon</i>          | Glasgow             | EC 9-24-45                                               |
| 1845 | <i>Sesostris</i>       | Glasgow             | EC 10-1-45                                               |
| 1845 | <i>Taymouth Castle</i> | Glasgow             | EC 11-5-45                                               |
| 1832 | <i>Charlotte Kerr</i>  | Glasgow, Tobermory  | Campey Appd II.                                          |
| 1832 | <i>Charlotte Kerr</i>  | Glasgow, Tobermory  | Campey, Appd II                                          |
| 1833 | <i>Charlotte Kerr</i>  | Glasgow, Tobermory  | Campey, Appd II                                          |
| 1828 | <i>Thetis</i>          | Greenock            | CP 5-14-28; Campey, Appd. II                             |
| 1828 | <i>Thetis</i>          | Greenock            | CP 10-1-28                                               |
| 1829 | <i>Hero</i>            | Greenock            | Campey, Appendix II (May)                                |
| 1829 | <i>James</i>           | Greenock            | CP 10-14-29                                              |
| 1829 | <i>Nero</i>            | Greenock            | CP 7-22-29; Campey, Appd. II                             |
| 1830 | <i>Brixton</i>         | Greenock            | CP 5-29-30                                               |
| 1830 | <i>Corsair</i>         | Greenock            | Campey, Appd II                                          |
| 1830 | <i>Friends</i>         | Greenock            | CP 6-5-30                                                |
| 1830 | <i>Isabella</i>        | Greenock            | CP 5-29-30                                               |
| 1831 | <i>Crown</i>           | Greenock            | CP 5-21-31                                               |
| 1832 | <i>Mercator</i>        | Greenock            | CP 6-23-32                                               |
| 1832 | <i>Phoenix</i>         | Greenock            | CP 5-12-32                                               |
| 1833 | <i>Mercator</i>        | Greenock            | CP 5-21-33                                               |
| 1834 | <i>George Barclay</i>  | Greenock            | Campey, Appd II                                          |
| 1834 | <i>Mercator</i>        | Greenock            | Campey, Appd II                                          |
| 1835 | <i>Mercator</i>        | Greenock            | NS 9-3-35                                                |
| 1836 | <i>Ann Grant</i>       | Greenock            | Campey, Appd II (May)                                    |
| 1836 | <i>Ann Grant</i>       | Greenock            | NS 9-14-36; Campey, Appd II (August)                     |
| 1837 | <i>Isabella</i>        | Greenock            | Campey, Appd II                                          |
| 1838 | <i>Isabella</i>        | Greenock            | PO 9-4-38; RG 31-104.v18n9; Campey, Appd. II             |
| 1838 | <i>Isabella</i>        | Greenock            | RG 31-104 v18n6 (May)                                    |
| 1839 | <i>Isabella</i>        | Greenock            | PO 5-21-39                                               |
| 1839 | <i>Isabella</i>        | Greenock            | PO 9-10-39                                               |
| 1840 | <i>Hope</i>            | Greenock            | PANS microf 220, v2, n18                                 |
| 1840 | <i>Isabella</i>        | Greenock            | PANS 220 v2, n18; PO 8-18-40; Campey, Appd. II (depJuly) |
| 1840 | <i>Isabella</i>        | Greenock            | Campey, App II; PANS 220, v2,n18 (depart: April)         |
| 1841 | <i>Divine</i>          | Greenock            | PANS 221, v3,n3                                          |
| 1841 | <i>Isabella</i>        | Greenock            | PANS 221, v3, n3 (May)                                   |
| 1841 | <i>Isabella</i>        | Greenock            | PANS 221, v3, n3 (August)                                |
| 1842 | <i>Cleostratus</i>     | Greenock            | MF 10-5-42                                               |
| 1843 | <i>Perthshire</i>      | Greenock            | PANS 221, v4,n46; EC 10-11-43                            |
| 1844 | <i>Nautilus</i>        | Greenock            | EC 9-11-44                                               |
| 1845 | <i>Hamilton</i>        | Greenock            | EC 9-24-45                                               |
| 1840 | <i>Deveron</i>         | Greenock, Lochinver | PO 6-23-40; Campey, Appd II                              |
| 1840 | <i>Hanover</i>         | Havre               | PO 9-1-40                                                |

---

|      |                         |                         |                                |
|------|-------------------------|-------------------------|--------------------------------|
| 1842 | <i>Corea</i>            | Havre                   | MF 8-31-42                     |
| 1842 | <i>Ferax</i>            | Havre                   | MF 9-26-42                     |
| 1828 | <i>Chilton</i>          | Hull                    | CP 5-14-28                     |
| 1828 | <i>Piersons</i>         | Hull                    | CP 5-14-28                     |
| 1828 | <i>Samuel Barrett</i>   | Hull                    | CP 5-21-28                     |
| 1829 | <i>Chilton</i>          | Hull                    | CP 5-20-29                     |
| 1830 | <i>Barrick</i>          | Hull                    | CP 6-5-30                      |
| 1830 | <i>Derou</i>            | Hull                    | CP 5-28-30                     |
| 1830 | <i>Economy</i>          | Hull                    | CP 5-22-30                     |
| 1830 | <i>Janus</i>            | Hull                    | CP 5-28-30                     |
| 1831 | <i>Chilton</i>          | Hull                    | CP 5-23-31                     |
| 1832 | <i>Chilton</i>          | Hull                    | CP 5-23-32                     |
| 1833 | <i>Chilton</i>          | Hull                    | CP 5-28-33                     |
| 1833 | <i>Chilton</i>          | Hull                    | CP 10-8-33                     |
| 1834 | <i>Ann</i>              | Hull                    | NS 10-15-34                    |
| 1834 | <i>Tertius</i>          | Hull                    | NS 7-16-34                     |
| 1834 | <i>Turtep</i>           | Hull                    | NS 7-21-34                     |
| 1835 | <i>Chilton</i>          | Hull                    | NS 6-25-35                     |
| 1835 | <i>Harvest Home</i>     | Hull                    | NS 10-1-35                     |
| 1838 | <i>Prince Leboo</i>     | Hull                    | PO 10-9-38                     |
| 1839 | <i>Baron</i>            | Hull                    | PO 10-29-39                    |
| 1839 | <i>Prince Le Boo</i>    | Hull                    | PO 6-11-39                     |
| 1839 | <i>Volunteer</i>        | Hull                    | PO 6-11-39                     |
| 1840 | <i>Wilsons</i>          | Hull                    | NS 9-3-40                      |
| 1843 | <i>Kingston</i>         | Hull                    | PANS 221, v4, n46              |
| 1843 | <i>Yorkshire</i>        | Hull                    | EC 10-4-43                     |
| 1832 | <i>Canada</i>           | Inverness               | CP 7-28-32                     |
| 1833 | <i>Zepher</i>           | Inverness               | CP 7-30-33                     |
| 1828 | <i>Caroline</i>         | Inverness, Fort William | Campey, Appendix II; CP 6-4-28 |
| 1830 | <i>Diana</i>            | Leith                   | Dobson, 1998                   |
| 1830 | <i>Sisters</i>          | Leith                   | CP 6-15-30                     |
| 1833 | <i>Economist</i>        | Leith, Cromarty         | CP 8-13-33; Campey, Appd II    |
| 1831 | <i>Corsair</i>          | Leith, Cromarty         | CP 8-20-31; Campey             |
| 1831 | <i>Rover</i>            | Leith, Cromarty, Thurso | Campey, Appd II; CP 8-27-31    |
| 1840 | <i>Osprey</i>           | Leith, Cromarty, Thurso | Campey, App II                 |
| 1831 | <i>Brixton</i>          | Limerick                | CP 9-17-31                     |
| 1831 | <i>Wm. Harrington</i>   | Limerick                | CP 8-20-31                     |
| 1833 | <i>Pictou</i>           | Limerick                | CP 5-28-33                     |
| 1838 | <i>Traveller</i>        | Limerick                | PO 10-23-38                    |
| 1844 | <i>Britannia</i>        | Limerick                | EC 9-4-44                      |
| 1828 | <i>George</i>           | Liverpool               | CP 10-1-28                     |
| 1828 | <i>Maria</i>            | Liverpool               | CP 5-14-28                     |
| 1828 | <i>Sarah</i>            | Liverpool               | CP 10-1-28                     |
| 1828 | <i>Thomas Battersby</i> | Liverpool               | CP 8-6-28                      |
| 1829 | <i>Aeolus</i>           | Liverpool               | CP 7-1-29                      |
| 1829 | <i>Aid</i>              | Liverpool               | CP 5-13-29                     |

---

|      |                        |           |                                     |
|------|------------------------|-----------|-------------------------------------|
| 1829 | <i>Blessing</i>        | Liverpool | CP 5-20-29                          |
| 1829 | <i>Caledonia</i>       | Liverpool | CP 7-1-29                           |
| 1829 | <i>Cumbrian</i>        | Liverpool | CP 7-22-29                          |
| 1829 | <i>Doctor</i>          | Liverpool | CP 6-10-29                          |
| 1829 | <i>Henrietta</i>       | Liverpool | CP 6-3-29                           |
| 1829 | <i>Henrietta</i>       | Liverpool | CP 10-14-29                         |
| 1829 | <i>Nanna</i>           | Liverpool | CP 8-19-29                          |
| 1829 | <i>Nanna</i>           | Liverpool | CP 8-19-29                          |
| 1830 | <i>Barrick</i>         | Liverpool | CP 11-6-30                          |
| 1830 | <i>Blessing</i>        | Liverpool | CP 6-5-30                           |
| 1830 | <i>Columbus</i>        | Liverpool | CP 5-1-30                           |
| 1830 | <i>Erin</i>            | Liverpool | CP 6-5-30                           |
| 1830 | <i>Henrietta</i>       | Liverpool | CP 11-6-30                          |
| 1830 | <i>Henrietta</i>       | Liverpool | CP 6-5-30                           |
| 1830 | <i>Waterloo</i>        | Liverpool | CP 6-12-30                          |
| 1831 | <i>Doctor</i>          | Liverpool | CP 8-13-31                          |
| 1831 | <i>Erin</i>            | Liverpool | CP 5-14-31                          |
| 1831 | <i>Erin</i>            | Liverpool | CP 9-10-31                          |
| 1831 | <i>Henrietta</i>       | Liverpool | CP 8-31-31                          |
| 1831 | <i>Peace</i>           | Liverpool | CP 5-28-31                          |
| 1831 | <i>Symmetry</i>        | Liverpool | CP 5-14-31                          |
| 1832 | <i>Atlantic</i>        | Liverpool | CP 7-7-32                           |
| 1832 | <i>Economy</i>         | Liverpool | CP 8-18-32                          |
| 1832 | <i>Erin</i>            | Liverpool | CP 6-9-32                           |
| 1833 | <i>Columbus</i>        | Liverpool | CP 6-11-33                          |
| 1833 | <i>Lady Ann</i>        | Liverpool | CP 10-15-33                         |
| 1833 | <i>Zebulon</i>         | Liverpool | CP 9-3-33                           |
| 1834 | <i>Benjamin Shaw</i>   | Liverpool | NS 5-28-34                          |
| 1835 | <i>Maria</i>           | Liverpool | NS 6-25-35                          |
| 1835 | <i>Pleiades</i>        | Liverpool | NS 6-25-35                          |
| 1836 | <i>Ann</i>             | Liverpool | NS 10-26-36                         |
| 1836 | <i>Athabaska</i>       | Liverpool | NS 10-26-36                         |
| 1837 | <i>Garland</i>         | Liverpool | NS 5-31-37                          |
| 1837 | <i>Louisa</i>          | Liverpool | NS 9-6-37                           |
| 1837 | <i>Sally</i>           | Liverpool | NS 5-31-37                          |
| 1838 | <i>Enterprise</i>      | Liverpool | RG 31-104 v18n6                     |
| 1838 | <i>Mary Ann Hatton</i> | Liverpool | RG 31-104.v18n13; PO 10-23-38       |
| 1838 | <i>Mary Ann Hatton</i> | Liverpool | RG 31-104 v18n6 (May)               |
| 1838 | <i>Volunteer</i>       | Liverpool | RG 31-104 v18n6                     |
| 1839 | <i>George</i>          | Liverpool | PO 10-29-39                         |
| 1839 | <i>Kiel</i>            | Liverpool | PO 5-21-39                          |
| 1839 | <i>Mary Ann Hatton</i> | Liverpool | PO 5-21-39                          |
| 1839 | <i>Mary Ann Hatton</i> | Liverpool | PO 10-22-39                         |
| 1840 | <i>Isabella</i>        | Liverpool | PANS microf 220,v2,n18              |
| 1840 | <i>Loyalist</i>        | Liverpool | PANS microf 220,v2,n18; PO 10-27-40 |
| 1840 | <i>Loyalist</i>        | Liverpool | MF 6-29-40; PANS microf 220, v2,n18 |

|      |                           |                                 |                                  |
|------|---------------------------|---------------------------------|----------------------------------|
| 1840 | <i>Susan</i>              | Liverpool                       | NS 9-3-40                        |
| 1840 | <i>William Hinch</i>      | Liverpool                       | PO 11-3-40                       |
| 1841 | <i>Loyalist</i>           | Liverpool                       | PANS microf 221,v3,n3            |
| 1841 | <i>Manley</i>             | Liverpool                       | PANS microf 221,v3,n3            |
| 1842 | <i>Loyalist</i>           | Liverpool                       | MF 6-29-42                       |
| 1843 | <i>Assistance</i>         | Liverpool                       | MF 6-14-43                       |
| 1843 | <i>Sesostris</i>          | Liverpool                       | PANS microf 221,v4,n46           |
| 1843 | <i>Yorkshire</i>          | Liverpool                       | PANS microf 221,v4,n46 (June)    |
| 1843 | <i>Yorkshire</i>          | Liverpool                       | PANS microf 221,v4,n46 (October) |
| 1844 | <i>Sesostris</i>          | Liverpool                       | EC 7-24-44                       |
| 1844 | <i>True Blue</i>          | Liverpool                       | EC 5-29-44                       |
| 1845 | <i>Countess of Durham</i> | Liverpool                       | EC 8-27-45                       |
| 1845 | <i>Providence</i>         | Liverpool                       | EC 9-17-45                       |
| 1845 | <i>Sesostris</i>          | Liverpool                       | EC 6-18-45                       |
| 1845 | <i>True Blue</i>          | Liverpool                       | EC 5-28-45                       |
| 1831 | <i>Tweed</i>              | Liverpool (passed<br>harbour)   | CP 6-11-31                       |
| 1828 | <i>Tolson</i>             | Liverpool (via<br>Newfoundland) | CP 7-2-28                        |
| 1837 | <i>Haire (Havre?)</i>     | Liverpool (GB?) <sup>†</sup>    | NS 8-9-37                        |
| 1843 | <i>George</i>             | Loch Laxford                    | Campey, App II                   |
| 1828 | <i>Mantura</i>            | London                          | CP 7-16-28                       |
| 1828 | <i>Mexico</i>             | London                          | CP 6-4-28                        |
| 1828 | <i>Spey</i>               | London                          | CP 10-1-28                       |
| 1828 | <i>Standard</i>           | London                          | CP 5-28-28                       |
| 1829 | <i>Hiperian</i>           | London                          | CP 5-20-29                       |
| 1829 | <i>Isabella</i>           | London                          | CP 5-20-29                       |
| 1830 | <i>Arion</i>              | London                          | CP 5-29-30                       |
| 1830 | <i>John</i>               | London                          | CP 6-19-30                       |
| 1830 | <i>Spey</i>               | London                          | CP 5-29-30                       |
| 1830 | <i>Wansbeck</i>           | London                          | CP 6-5-30                        |
| 1832 | <i>Good Czar</i>          | London                          | CP 5-30-32                       |
| 1832 | <i>Marwood</i>            | London                          | CP 5-19-32                       |
| 1834 | <i>Loyalist</i>           | London                          | NS 10-23-34                      |
| 1835 | <i>Stephen</i>            | London                          | NS 10-1-35                       |
| 1836 | <i>Emeline</i>            | London                          | NS 9-14-36                       |
| 1837 | <i>Harvest Home</i>       | London                          | NS 7-5-37                        |
| 1838 | <i>Thetis</i>             | London                          | RG 31-104 v18n6                  |
| 1839 | <i>Cesias Price</i>       | London                          | MF 5-29-39                       |
| 1839 | <i>Lilburn</i>            | London                          | PO 9-10-39                       |
| 1839 | <i>Maria</i>              | London                          | PO 6-4-39                        |
| 1839 | <i>Stephen</i>            | London                          | PO 5-28-39                       |
| 1839 | <i>Stephen</i>            | London                          | PO 10-8-39                       |
| 1840 | <i>Elizabeth</i>          | London                          | PO 5-12-40                       |
| 1840 | <i>George</i>             | London                          | PO 5-19-40                       |
| 1840 | <i>John Craig</i>         | London                          | PANS microf 220,v2,n18           |

|      |                         |                                |                                    |
|------|-------------------------|--------------------------------|------------------------------------|
| 1840 | <i>Ythan</i>            | London                         | PO 6-23-40                         |
| 1842 | <i>Jane</i>             | London                         | MF 8-10-42                         |
| 1831 | <i>Bainbridge</i>       | London (via Halifax)           | CP 8-27-31                         |
| 1842 | <i>Commerce</i>         | Marsielles                     | MF 8-10-42                         |
| 1833 | <i>Eliza</i>            | Memel (Klaipeda,<br>Lithuania) | CP 8-27-33                         |
| 1833 | <i>Gateshead</i>        | Memel (Klaipeda,<br>Lithuania) | CP 7-23-33                         |
| 1833 | <i>Johns</i>            | Memel (Klaipeda,<br>Lithuania) | CP 8-20-33                         |
| 1834 | <i>Lord Ravensworth</i> | Memel (Klaipeda,<br>Lithuania) | NS 7-28-34                         |
| 1829 | <i>Isabella</i>         | Nevis                          | CP 9-9-29                          |
| 1828 | <i>Polly</i>            | Newcastle                      | CP 5-14-28                         |
| 1829 | <i>Spey</i>             | Newcastle                      | CP 6-10-29                         |
| 1830 | <i>Harvest Home</i>     | Newcastle                      | CP 5-22-30                         |
| 1830 | <i>Stephen</i>          | Newcastle                      | CP 5-29-30                         |
| 1831 | <i>Barbara</i>          | Newcastle                      | CP 5-21-31                         |
| 1831 | <i>Columbus</i>         | Newcastle                      | CP 5-21-31                         |
| 1831 | <i>Elizabeth</i>        | Newcastle                      | CP 5-14-31                         |
| 1831 | <i>Mary Johnston</i>    | Newcastle                      | CP 5-28-31                         |
| 1831 | <i>Stephen</i>          | Newcastle                      | CP 5-21-31                         |
| 1832 | <i>Elizabeth</i>        | Newcastle                      | CP 9-29-32                         |
| 1832 | <i>Mary</i>             | Newcastle                      | CP 8-18-32                         |
| 1832 | <i>Stephen</i>          | Newcastle                      | CP 6-9-32                          |
| 1833 | <i>Tom Bowline</i>      | Newcastle                      | CP 5-21-33                         |
| 1834 | <i>Elizabeth</i>        | Newcastle                      | NS 6-4-34                          |
| 1834 | <i>Harvest Home</i>     | Newcastle                      | NS 10-8-34                         |
| 1834 | <i>Stephen</i>          | Newcastle                      | NS 5-22-34, CP 5-22-34             |
| 1834 | <i>Syrene</i>           | Newcastle                      | CP 5-22-34                         |
| 1835 | <i>Polly</i>            | Newcastle                      | NS 10-1-35                         |
| 1836 | <i>Stephen</i>          | Newcastle                      | NS 9-21-36                         |
| 1837 | <i>Ormond</i>           | Newcastle                      | NS 7-5-37                          |
| 1838 | <i>Isabella</i>         | Newcastle                      | PO 10-30-38                        |
| 1838 | <i>Isabella</i>         | Newcastle                      | RG 31-104.v18n13                   |
| 1838 | <i>Stephen</i>          | Newcastle                      | RG 31-104.v18n9                    |
| 1838 | <i>Woodman</i>          | Newcastle                      | PO 10-2-38; RG 31-104.v18n13       |
| 1838 | <i>Woodman</i>          | Newcastle                      | RG 31-104 v18n6 (May)              |
| 1839 | <i>Elizabeth</i>        | Newcastle                      | PO 9-10-39                         |
| 1839 | <i>Harvest Home</i>     | Newcastle                      | PO 5-28-39                         |
| 1839 | <i>Lowther</i>          | Newcastle                      | PO 10-8-39                         |
| 1839 | <i>Ythan</i>            | Newcastle                      | PO 5-28-39                         |
| 1840 | <i>Harvest Home</i>     | Newcastle                      | PANS microf 220,v2,n18; NS 9-17-40 |
| 1840 | <i>Stephen</i>          | Newcastle                      | PANS microf 220,v2,n18             |
| 1841 | <i>Stephen</i>          | Newcastle                      | PANS microf 221,v3,n3              |
| 1842 | <i>Acadia</i>           | Newcastle                      | MF 6-1-42                          |

|      |                              |                             |                             |
|------|------------------------------|-----------------------------|-----------------------------|
| 1842 | <i>Nancy</i>                 | Newcastle                   | MF 8-31-42                  |
| 1843 | <i>Woodbine</i>              | Newcastle                   | PANS microf 221,v4,n46      |
| 1844 | <i>Jane</i>                  | Newcastle                   | EC 6-19-44                  |
| 1845 | <i>Harvest Home</i>          | Newcastle                   | EC 5-21-45                  |
| 1845 | <i>Mosely</i>                | Newcastle                   | EC 6-25-45                  |
| 1828 | <i>Barbara</i>               | Newcastle                   | CP 10-1-28                  |
| 1828 | <i>Barbara</i>               | Newcastle                   | CP 10-1-28                  |
| 1828 | <i>Lord St. Helens</i>       | Newcastle                   | CP 5-14-28                  |
| 1828 | <i>Lord St. Helens</i>       | Newcastle                   | CP 5-14-28                  |
| 1828 | <i>Polly</i>                 | Newcastle                   | CP 5-14-28                  |
| 1829 | <i>Elizabeth &amp; Sarah</i> | Newcastle                   | CP 5-13-29                  |
| 1829 | <i>Elizabeth &amp; Sarah</i> | Newcastle                   | CP 5-13-29                  |
| 1829 | <i>Harvest Home</i>          | Newcastle                   | CP 10-8-29                  |
| 1829 | <i>Harvest Home</i>          | Newcastle                   | CP 10-8-29                  |
| 1829 | <i>John</i>                  | Newcastle                   | CP 5-29-29                  |
| 1829 | <i>John</i>                  | Newcastle                   | CP 5-29-29                  |
| 1829 | <i>Spey</i>                  | Newcastle                   | CP 6-10-29                  |
| 1831 | <i>British Tar</i>           | Newcastle                   | CP 9-24-31                  |
| 1831 | <i>Grecian</i>               | Newcastle                   | CP 11-5-31                  |
| 1831 | <i>Lord St. Helens</i>       | Newcastle                   | CP 9-24-31                  |
| 1833 | <i>Elizabeth</i>             | Newcastle                   | CP 10-15-33                 |
| 1836 | <i>Commerce</i>              | North Shields               | NS 9-14-36                  |
| 1839 | <i>Voluna</i>                | Padstow                     | PO 10-29-39                 |
| 1829 | <i>Elizabeth</i>             | Plymouth                    | CP 5-13-29                  |
| 1830 | <i>Barbara</i>               | Plymouth                    | CP 5-15-30                  |
| 1833 | <i>Mary</i>                  | Plymouth (GB?) <sup>†</sup> | CP 6-18-33                  |
| 1834 | <i>Nancy</i>                 | Plymouth (GB?) <sup>†</sup> | NS 5-14-34                  |
| 1836 | <i>Enterprize</i>            | Plymouth (GB?) <sup>†</sup> | NS 10-26-36                 |
| 1838 | <i>Laurel</i>                | Plymouth (GB?) <sup>†</sup> | PO 6-26-38                  |
| 1843 | <i>Coquet</i>                | Plymouth                    | MF 7-12-43                  |
| 1831 | <i>Malta</i>                 | Poole                       | CP 5-28-31                  |
| 1841 | <i>Cleostratus</i>           | Port Glasgow                | PANS microf 221,v3,n3       |
| 1828 | <i>Marjory</i>               | Portsmouth                  | CP 5-21-28                  |
| 1832 | <i>Thetis</i>                | Portsmouth                  | CP 5-5-32                   |
| 1835 | <i>Maria</i>                 | Portsmouth                  | NS 8-12-35                  |
| 1845 | <i>Countess of Durham</i>    | Portsmouth                  | EC 11-26-45                 |
| 1842 | <i>Shamrock</i>              | Rotterdam                   | MF 9-26-42                  |
| 1829 | <i>Economy</i>               | Shields                     | CP 6-10-29                  |
| 1845 | <i>Justiman</i>              | Shields                     | EC 5-21-45                  |
| 1835 | <i>Union</i>                 | Somerset                    | NS 8-19-35                  |
| 1838 | <i>Lebanon</i>               | Stockbridge                 | PO 10-9-38                  |
| 1828 | <i>Ibbettson</i>             | Stockton                    | CP 5-14-28                  |
| 1833 | <i>Stephen</i>               | Stockton                    | CP 11-5-33                  |
| 1838 | <i>North York</i>            | Stockton                    | PO 7-17-38; RG 31-104.v18n9 |
| 1838 | <i>North York</i>            | Stockton                    | PO 7-17-38                  |
| 1839 | <i>North York</i>            | Stockton                    | PO 10-15-39                 |



|                  |                           |                                |                                   |
|------------------|---------------------------|--------------------------------|-----------------------------------|
| 1839             | <i>William Thompson</i>   | Stockton                       | PO 6-4-39                         |
| 1840             | <i>Chance</i>             | Stockton                       | PO 9-8-40; PANS 220,v2,n18        |
| 1840             | <i>Europe</i>             | Stockton                       | PANS microf 220,v2,n18;PO 7-28-40 |
| 1840             | <i>Wandering Shephard</i> | Stockton                       | PANS microf 220,v2,n18            |
| 1841             | <i>Chance</i>             | Stockton                       | PANS microf 221,v3,n3             |
| 1837             | <i>Hercules</i>           | Stornoway                      | Campey Appd II.                   |
| 1843             | <i>Jessie</i>             | Stornoway                      | PANS microf 221,v4,n46            |
| 1844             | <i>Jessie</i>             | Stornoway                      | EC 6-19-44                        |
| 1845             | <i>Sovereign</i>          | Stromness, Lochmaddy           | Campey, App II                    |
| 1832             | <i>Athone</i>             | Sunderland                     | CP 5-5-32                         |
| 1832             | <i>Hope</i>               | Sunderland                     | CP 5-5-32                         |
| 1832             | <i>Janus</i>              | Sunderland                     | CP 9-22-32                        |
| 1832             | <i>Thomas &amp; Mary</i>  | Sunderland                     | CP 6-16-32                        |
| 1834             | <i>Brothers</i>           | Sunderland                     | NS 5-14-34                        |
| 1834             | <i>Cyres</i>              | Sunderland                     | NS 6-4-34, CP 5-6-34              |
| 1834             | <i>King William</i>       | Sunderland                     | NS 9-17-34                        |
| 1835             | <i>Jane</i>               | Sunderland                     | NS 8-26-35                        |
| 1839             | <i>Cesias</i>             | Sunderland                     | PO 5-28-39                        |
| 1840             | <i>Plato</i>              | Sunderland                     | PO 6-2-40                         |
| 1843             | <i>Rainbow</i>            | Sunderland                     | PANS microf 221, v4,n46           |
| 1844             | <i>Wave</i>               | Sunderland                     | EC 6-5-44                         |
| 1828             | <i>Loon</i>               | Swansea                        | CP 10-1-28                        |
| 1829             | <i>Two Sisters</i>        | The Clyde                      | Campey, Appendix II               |
| 1841             | <i>Cleostratus</i>        | The Clyde                      | Campey, App II                    |
| 1841             | <i>Pacific</i>            | Thurso                         | Campey, App II                    |
| 1841             | <i>Unicorn</i>            | Thurso                         | Campey, App II                    |
| 1841             | <i>Universe</i>           | Thurso                         | Campey, App II                    |
| 1830             | <i>Benjamin Shaw</i>      | Waterford                      | CP 5-29-30                        |
| 1831             | <i>Industry</i>           | Waterford                      | CP 7-7-31                         |
| 1831             | <i>Pandora</i>            | Waterford                      | CP 5-28-31                        |
| 1833             | <i>Molly Moore</i>        | Waterford                      | CP 8-27-33                        |
| 1834             | <i>Molly Moore</i>        | Waterford                      | NS 9-10-34                        |
| 1838             | <i>Ann &amp; Mary</i>     | Waterford                      | PO 8-28-38                        |
| 1828             | <i>Chilton</i>            | Whitby                         | CP 9-24-28                        |
| 1828             | <i>Vigilant</i>           | Whitby                         | CP 5-14-28                        |
| 1829             | <i>Vigilent</i>           | Whitby                         | CP 7-1-29                         |
| 1828             | <i>Bittern</i>            | Wick                           | CP 5-14-28                        |
| 1830             | <i>Bittern</i>            | Wick                           | CP 5-29-30                        |
| 1828             | <i>Kitty</i>              | Yarmouth                       | CP 9-24-28                        |
| <b>1846-1861</b> |                           |                                |                                   |
| 1846             | <i>Concord</i>            | Belfast                        | EC 9-17-46                        |
| 1847             | <i>Glenroy</i>            | Belfast (GB?) <sup>†</sup>     | EC 7-1-47                         |
| 1850             | <i>Alisa</i>              | Bristol                        | EC 10-3-50                        |
| 1861             | <i>Jane</i>               | Bristol                        | EC 9-12-61                        |
| 1846             | <i>Alarm</i>              | Cork (enroute to<br>Miramichi) | EC 9-21-46                        |

|      |                         |                                   |                                               |
|------|-------------------------|-----------------------------------|-----------------------------------------------|
| 1846 | <i>British Queen</i>    | Cork                              | EC 9-17-46                                    |
| 1850 | <i>George</i>           | Cromarty, Thurso, Loch<br>Laxford | Campey, App. II                               |
| 1860 | <i>Glengarry</i>        | Dublin                            | EC 9-13-60                                    |
| 1846 | <i>Harvest Home</i>     | Falmouth                          | EC 5-20-46                                    |
| 1846 | <i>Harvest Home</i>     | Falmouth                          | EC 9-21-46                                    |
| 1846 | <i>Invermore</i>        | Glasgow                           | EC 10-1-46                                    |
| 1846 | <i>London</i>           | Glasgow                           | EC 5-13-46                                    |
| 1846 | <i>Margaret Pointer</i> | Glasgow                           | EC 5-6-46                                     |
| 1846 | <i>Sesostris</i>        | Glasgow                           | EC 10-8-46                                    |
| 1846 | <i>Southampton</i>      | Glasgow                           | EC 7-30-46                                    |
| 1847 | <i>Cora Lynn</i>        | Glasgow                           | EC 9-16-47                                    |
| 1847 | <i>Hope</i>             | Glasgow                           | Campey, App II                                |
| 1847 | <i>Lucins Cary</i>      | Glasgow                           | EC 6-3-47                                     |
| 1847 | <i>Sesostris</i>        | Glasgow                           | EC 10-21-47                                   |
| 1848 | <i>Hope</i>             | Glasgow                           | Dobson, 2000-02; Campey, App II               |
| 1848 | <i>London</i>           | Glasgow                           | EC 8-24-48; Campey, Appd. II                  |
| 1848 | <i>London</i>           | Glasgow                           | Campey, App II (April departure)              |
| 1848 | <i>Lulan</i>            | Glasgow                           | EC 9-21-48; Campey, Appd. II                  |
| 1848 | <i>Perthshire</i>       | Glasgow                           | EC 6-15-48                                    |
| 1848 | <i>Perthshire</i>       | Glasgow                           | EC 9-28-48                                    |
| 1849 | <i>Sarah Botsford</i>   | Glasgow                           | EC 9-27-49; Campey, Appd. II                  |
| 1850 | <i>Janet</i>            | Glasgow                           | EC 6-13-50                                    |
| 1850 | <i>Perthshire</i>       | Glasgow                           | EC 10-24-50                                   |
| 1851 | <i>Agnes Sophia</i>     | Glasgow                           | EC 5-8-51                                     |
| 1851 | <i>Sarah Botsford</i>   | Glasgow                           | EC 5-8-51; Campey, Appd. II                   |
| 1852 | <i>Bride</i>            | Glasgow                           | EC 9-21-52                                    |
| 1852 | <i>Lulan</i>            | Glasgow                           | EC 9-28-52; Campey, Appd. II (depart:<br>Aug) |
| 1852 | <i>Tongataboo</i>       | Glasgow                           | Campey, APP. II                               |
| 1853 | <i>Catherine</i>        | Glasgow                           | EC 6-14-53                                    |
| 1853 | <i>Henry Poole</i>      | Glasgow                           | EC 8-16-53                                    |
| 1853 | <i>Sydney</i>           | Glasgow                           | EC 11-15-53                                   |
| 1854 | <i>St. Mungo</i>        | Glasgow                           | EC 5-18-54                                    |
| 1854 | <i>Voltigeur</i>        | Glasgow                           | EC 10-26-54                                   |
| 1855 | <i>Rebecca</i>          | Glasgow                           | EC 8-23-55                                    |
| 1856 | <i>Meteor Flag</i>      | Glasgow                           | EC 10-2-56                                    |
| 1856 | <i>Rebecca</i>          | Glasgow                           | EC 5-15-56                                    |
| 1856 | <i>Voltigeur</i>        | Glasgow                           | EC 5-15-56                                    |
| 1857 | <i>Commodore</i>        | Glasgow                           | RG31-102.v17n14 (April)                       |
| 1857 | <i>Commodore</i>        | Glasgow                           | RG31-102.v17n14 (July)                        |
| 1857 | <i>Commodore</i>        | Glasgow                           | RG31-102.v17n14 (October)                     |
| 1857 | <i>Meteor Flag</i>      | Glasgow                           | RG31-102.v17n14 (April)                       |
| 1857 | <i>Meteor Flag</i>      | Glasgow                           | RG31-102.v17n14 (July)                        |
| 1857 | <i>Rebecca</i>          | Glasgow                           | RG31-102.v17n14                               |
| 1857 | <i>Sweetheart</i>       | Glasgow                           | RG31-102.v17n14                               |

---

|      |                           |                      |                                 |
|------|---------------------------|----------------------|---------------------------------|
| 1857 | <i>Voltigeur</i>          | Glasgow              | RG31-102.v17n14                 |
| 1858 | <i>Meteor Flag</i>        | Glasgow              | RG31-102.v19n8 (May)            |
| 1858 | <i>Meteor Flag</i>        | Glasgow              | RG31-102.v19n8 (July)           |
| 1858 | <i>Meteor Flag</i>        | Glasgow              | RG31-102.v19n8 (Sept)           |
| 1858 | <i>Voltigeur</i>          | Glasgow              | RG31-102.v19n8 (June)           |
| 1858 | <i>Voltigeur</i>          | Glasgow              | RG31-102.v19n8 (Nov)            |
| 1859 | <i>Bedouin</i>            | Glasgow              | EC 5-12-59                      |
| 1859 | <i>Orlebar</i>            | Glasgow              | EC 10-20-59                     |
| 1860 | <i>D'Israeli</i>          | Glasgow              | EC 5-10-60                      |
| 1860 | <i>Prince</i>             | Glasgow              | EC 10-18-60                     |
| 1861 | <i>Cabot</i>              | Glasgow              | EC 10-10-61                     |
| 1861 | <i>The Prince</i>         | Glasgow              | EC 5-10-61                      |
| 1861 | <i>Wolfe</i>              | Glasgow              | EC 9-5-61                       |
| 1852 | <i>Bride</i>              | Glasgow (via Boston) | EC 6-29-52                      |
| 1852 | <i>Lulan</i>              | Glasgow (via Boston) | Campey, APP. II (depart: April) |
| 1846 | <i>London</i>             | Greenock             | EC 8-13-46                      |
| 1846 | <i>Louisa</i>             | Greenock             | EC 9-10-46                      |
| 1846 | <i>Perthshire</i>         | Greenock             | EC 10-1-46                      |
| 1847 | <i>London</i>             | Greenock             | Campey, App II                  |
| 1852 | <i>Catherine Glen</i>     | Greenock             | EC 9-21-52                      |
| 1855 | <i>Rogers Stewart</i>     | Greenock             | EC 6-21-55                      |
| 1855 | <i>Voltigeur</i>          | Greenock             | EC 10-18-55                     |
| 1856 | <i>D'Israeli</i>          | Greenock             | EC 10-2-56                      |
| 1846 | <i>Nestor</i>             | Havre                | EC 10-8-46                      |
| 1846 | <i>Urania Swan</i>        | Havre                | EC 9-17-46                      |
| 1850 | <i>Amizon (Amazon?)</i>   | Hull                 | EC 9-19-50                      |
| 1846 | <i>D.B.</i>               | Limerick             | EC 9-3-46                       |
| 1847 | <i>Mayflower</i>          | Limerick             | Johnston, p. 263                |
| 1846 | <i>Charles Joseph</i>     | Liverpool            | EC 9-3-46                       |
| 1846 | <i>Havre</i>              | Liverpool            | EC 8-27-46                      |
| 1846 | <i>Infanta</i>            | Liverpool            | EC 6-11-46                      |
| 1846 | <i>True Blue</i>          | Liverpool            | EC 5-28-46                      |
| 1846 | <i>True Blue</i>          | Liverpool            | EC 9-21-46                      |
| 1847 | <i>Conqueror</i>          | Liverpool            | EC 6-10-47                      |
| 1847 | <i>Mary &amp; Harriet</i> | Liverpool            | EC 11-4-47                      |
| 1847 | <i>Stentor</i>            | Liverpool            | EC 9-23-47                      |
| 1847 | <i>True Blue</i>          | Liverpool            | EC 6-3-47                       |
| 1848 | <i>Star</i>               | Liverpool            | EC 6-29-48                      |
| 1848 | <i>True Blue</i>          | Liverpool            | EC 9-7-48                       |
| 1849 | <i>Richard Cobden</i>     | Liverpool            | EC 10-11-49                     |
| 1849 | <i>Sesostris</i>          | Liverpool            | EC 8-16-49                      |
| 1850 | <i>Georgat</i>            | Liverpool            | EC 5-16-50                      |
| 1851 | <i>Ann Patterson</i>      | Liverpool            | EC 5-15-51                      |
| 1851 | <i>Hammond</i>            | Liverpool            | EC 6-5-51                       |
| 1851 | <i>Hydes</i>              | Liverpool            | EC 5-22-51                      |
| 1852 | <i>Africa</i>             | Liverpool            | EC 10-11-52                     |

---

---

|      |                            |              |                 |
|------|----------------------------|--------------|-----------------|
| 1852 | <i>Standard</i>            | Liverpool    | EC 5-14-52      |
| 1853 | <i>Ellen</i>               | Liverpool    | EC 6-7-53       |
| 1853 | <i>Hunter</i>              | Liverpool    | EC 12-6-53      |
| 1853 | <i>Phoenix</i>             | Liverpool    | EC 8-30-53      |
| 1854 | <i>Argus</i>               | Liverpool    | EC 9-14-54      |
| 1854 | <i>Argus</i>               | Liverpool    | EC 5-18-54      |
| 1854 | <i>Ellen</i>               | Liverpool    | EC 6-15-54      |
| 1854 | <i>Pollock</i>             | Liverpool    | EC 10-19-54     |
| 1855 | <i>Industry</i>            | Liverpool    | EC 5-17-55      |
| 1856 | <i>Sebastopol</i>          | Liverpool    | EC 5-22-56      |
| 1856 | <i>Wolfe</i>               | Liverpool    | EC 5-29-56      |
| 1857 | <i>Margaret</i>            | Liverpool    | RG31-102.v17n14 |
| 1857 | <i>Wolfe</i>               | Liverpool    | RG31-102.v17n14 |
| 1858 | <i>Major Norton</i>        | Liverpool    | RG31-102.v19n8  |
| 1861 | <i>J. Titus</i>            | Liverpool    | EC 5-10-61      |
| 1861 | <i>The Prince</i>          | Liverpool    | EC 8-15-61      |
| 1848 | <i>Ellen</i>               | Loch Laxford | Campey, App II  |
| 1846 | <i>Acadia</i>              | London       | EC 9-17-46      |
| 1846 | <i>Albert</i>              | London       | EC 9-10-46      |
| 1846 | <i>Atica</i>               | London       | EC 9-10-46      |
| 1846 | <i>Helron</i>              | London       | EC 9-3-46       |
| 1846 | <i>St. Andrew</i>          | London       | EC 10-1-46      |
| 1847 | <i>George Henry</i>        | London       | EC 10-21-47     |
| 1847 | <i>James Edwards</i>       | London       | EC 9-16-47      |
| 1849 | <i>Moultan</i>             | London       | EC 9-27-49      |
| 1849 | <i>Thomas Henry</i>        | London       | EC 9-13-49      |
| 1856 | <i>Jane</i>                | London       | EC 5-29-56      |
| 1858 | <i>White Star</i>          | London       | RG31-102.v19n8  |
| 1860 | <i>Palestine</i>           | London       | EC 10-4-60      |
| 1860 | <i>Wolf (Wolfe?)</i>       | London       | EC 9-27-60      |
| 1861 | <i>Crimea</i>              | London       | EC 10-10-61     |
| 1861 | <i>Harvest Moon</i>        | London       | EC 10-10-61     |
| 1846 | <i>Stramfordham</i>        | Newcastle    | EC 6-11-46      |
| 1846 | <i>Xenophon</i>            | Newcastle    | EC 10-8-46      |
| 1847 | <i>Symmetry</i>            | Newcastle    | EC 7-1-47       |
| 1853 | <i>Homer</i>               | Newcastle    | EC 6-28-53      |
| 1853 | <i>Margaret Barrington</i> | Newcastle    | EC 6-28-53      |
| 1854 | <i>Hueston</i>             | Newcastle    | EC 8-3-54       |
| 1859 | <i>Alexander</i>           | Newcastle    | EC 7-28-59      |
| 1856 | <i>Roger Stewart</i>       | Newport      | EC 12-4-56      |
| 1849 | <i>Woodbine</i>            | Portsmouth   | EC 9-27-49      |
| 1847 | <i>Clarissa</i>            | Sligo        | EC 7-1-47       |
| 1847 | <i>Duncan</i>              | Sligo        | EC 7-1-47       |
| 1847 | <i>Hualco</i>              | Sligo        | EC 6-17-47      |
| 1861 | <i>David Chapins</i>       | Sligo        | EC 7-18-61      |
| 1861 | <i>Francis Artuhenus</i>   | Sligo        | EC 11-7-61      |

---

|      |                                      |            |                          |
|------|--------------------------------------|------------|--------------------------|
| 1850 | <i>Swallow</i>                       | Sunderland | EC 5-23-50               |
| 1847 | <i>Levant</i>                        | The Clyde  | Dobson, 2002             |
| 1850 | <i>Gartsherrie</i>                   | The Clyde  | EC 5-16-50               |
| 1850 | <i>Perthshire</i>                    | The Clyde  | EC 5-16-50               |
| 1851 | <i>Hamilton Campbell<br/>Kidston</i> | The Clyde  | EC 10-9-51               |
| 1858 | <i>Vasco da Gama</i>                 | The Clyde  | Dobson, 2002             |
| 1847 | <i>Sirius</i>                        | Thurso     | Campey, App II; Johnston |
| 1847 | <i>Washington</i>                    | Waterford  | EC 7-15-47               |
| 1852 | <i>Baticola</i>                      | Waterford  | EC 10-11-52              |
| 1854 | <i>Rambler</i>                       | Whitehead  | EC 8-3-54                |
| 1853 | <i>Prince Albert</i>                 | Yarmouth   | EC 11-29-53              |

Newspaper abbreviations: CP, *The Colonial Patriot*; MF, *The Mechanic and Farmer*; PO, *Pictou Observer*; NS, *The Nova Scotian*. Archive abbreviations: NAS, National Archives of Scotland; RG-102, RG-104, Public Archives of Nova Scotia.

\*Sources by author's last name, newspaper/date, or archive number of document (see *Materials and Methods*, references)

†Question mark indicates uncertainty about origin in Great Britain or North America, see *SI Methods*.

Additional references:

1. Dobson D (2002) *Ships from Scotland to America, 1628-1828* (Genealogical Publishing Co, Baltimore), Vol II.
2. Dobson D (2004) *Ships from Scotland to America, 1628-1828* (Genealogical Publishing Co, Baltimore), Vol III.
