# Supplementary material
Source: PubMed Central journal article supplement (PMC2688860)
Supplement: 0812300106_ST4_PDF.pdf [file 0812300106_ST4_PDF.pdf]

Table S4. Isolation by Migration analysis (IMa) for time of introduction of *Littorina littorea* to Nova Scotia based on 3 mutation rates (2, 3, 4%/MY) for cytochrome b and using 10 replicate runs for each treatment [all Nova Scotian snails ( $n = 61$ ) vs: (i) all European snails ( $n = 306$ ), (ii) all European snails except those from Great Britain & Ireland ( $n = 141$ ), or (iii) only samples from Great Britain & Ireland ( $n = 165$ )] and showing 95% confidence intervals.

| Mutation rate | Divergence time (years)                      |               |               |
|---------------|----------------------------------------------|---------------|---------------|
|               | 2 %                                          | 3%            | 4%            |
|               | NS vs. all EUR                               |               |               |
| Mean          | 11871(±3910)                                 | 7914 (±2607)  | 5935 (±1955)  |
| 95% low CI    | 5110 (±2116)                                 | 3406 (±1411)  | 2555 (±1058)  |
| 95% high CI   | 20210 (±5464)                                | 13473 (±3643) | 10105 (±2732) |
|               | NS vs. EUR without Great Britain and Ireland |               |               |
| Mean          | 46832 (±7786)                                | 31221 (±5190) | 23416 (±3892) |
| 95% low CI    | 21527 (±5244)                                | 14351 (±3496) | 10763 (±2622) |
| 95% high CI   | 82995 (±11876)                               | 55330 (±7918) | 41497 (±5938) |
|               | NS vs. Great Britain and Ireland             |               |               |
| Mean          | 3967 (±474)                                  | 2645 (±316)   | 1983 (±237)   |
| 95% low CI    | 384 (±49)                                    | 256 (±33)     | 192 (±24)     |
| 95% high CI   | 11794 (±1461)                                | 7863 (±975)   | 5897 (±731)   |

Haplotypes and sample sizes by collecting site are provided in Dataset S1.
