# Supplementary material
Source: PubMed Central journal article supplement (PMC2688860)
Supplement: 0812300106_ST5_PDF.pdf [file 0812300106_ST5_PDF.pdf]

**Table S5. List of ships sailing from Galway (1841-1851) to another British port at appropriate times to have transferred ballast to ship(s) sailing from that port to Pictou. Data on Galway from *Galway Vindicator* of indicated dates**

| Ship's name       | Sailing date | Destination | Source    | Cargo*                      | Ship(s) to Pictou<br>(length of voyage, if known)       |
|-------------------|--------------|-------------|-----------|-----------------------------|---------------------------------------------------------|
| <i>Newcastle</i>  | 8/29/1846    | Glasgow     | 8/29/1846 | Ballast                     | <i>Sesostris</i> (21 d)                                 |
| <i>Nevis</i>      | 4/17/1847    | Glasgow     | 4/17/1847 | General cargo               | <i>Lucins Cary</i> (57 d)                               |
| <i>Maria</i>      | 4/4/1850     | Glasgow     | 4/6/1850  | Kelp (ash)*                 | <i>Janet</i> (44 d)                                     |
| <i>Maria</i>      | 8/24/1850    | Glasgow     | 8/25/1850 | Kelp (ash)                  | <i>Perthshire</i>                                       |
| <i>Culloden</i>   | 2/29/1851    | Glasgow     | 3/5/1851  | Partial load kelp (ash)     | <i>Agnes Sophia</i> (29 d), <i>Sarah Botsford</i> (29d) |
| <i>Aim</i>        | 5/1/1847     | Greenock    | 5/1/1847  | Guano                       | <i>London</i>                                           |
| <i>Enterprise</i> | 5/8/1847     | Greenock    | 5/8/1847  | Beans                       | <i>London</i>                                           |
| <i>Katherine</i>  | 6/8/1844     | Limerick    | 6/8/1844  | “British goods”             | <i>Britannia</i>                                        |
| <i>Mercy Jane</i> | 6/28/1843    | Liverpool   | 6/28/1843 | Oats, wool                  | <i>Sesostris</i>                                        |
| <i>Williams</i>   | 8/5/1843     | Liverpool   | 8/6/1843  | Wheat, barley, oatmeal      | <i>Yorkshire</i>                                        |
| <i>Margaret</i>   | 3/16/44      | Liverpool   | 3/16/1844 | General cargo               | <i>True Blue</i> (55 d)                                 |
| <i>Rev.</i>       | 3/16/1844    | Liverpool   | 3/16/1844 | Wheat, flour                | <i>True Blue</i> (60 d)                                 |
| <i>Theobald</i>   |              |             |           |                             |                                                         |
| <i>Mathew</i>     |              |             |           |                             |                                                         |
| <i>Jane</i>       | 3/13/1847    | Liverpool   | 3/13/1847 | Ballast                     | <i>True Blue</i> (55 d), <i>Conqueror</i> (60 d)        |
| <i>Erin</i>       | 9/12/1847    | Liverpool   | 9/12/1847 | Ballast                     | <i>Mary &amp; Harriet</i> (44 d)                        |
| <i>John Begg</i>  | 9/15/1847    | Liverpool   | 9/15/1847 | Ballast                     | <i>Mary &amp; Harriet</i> (44 d)                        |
| <i>Mary Jane</i>  | 9/12/1847    | Liverpool   | 9/12/1847 | Ballast                     | <i>Mary &amp; Harriet</i> (44 d)                        |
| <i>Rubey</i>      | 9/15/1847    | Liverpool   | 9/15/1847 | Ballast                     | <i>Mary &amp; Harriet</i> (44 d)                        |
| <i>Matilda</i>    | 7/11/1848    | Liverpool   | 7/11/1848 | Ballast                     | <i>True Blue</i>                                        |
| <i>Harmony</i>    | 8/29/1849    | Liverpool   | 8/29/1849 | Salt                        | <i>Richard Cobden</i>                                   |
| <i>Industry</i>   | 3/9/1850     | Liverpool   | 3/6/1850  | General cargo               | <i>Georgat</i> (29 d)                                   |
| <i>Lord</i>       | 8/22/1846    | London      | 8/22/1846 | Oats, butter, bacon, salmon | <i>St. Andrew</i> (35 d)                                |
| <i>Fitzgerald</i> |              |             |           |                             |                                                         |
| <i>Rev. T.</i>    | 8/29/1846    | London      | 8/29/1846 | Oats, butter                | <i>St. Andrew</i> (35 d)                                |
| <i>Mathew</i>     |              |             |           |                             |                                                         |
| <i>Maas</i>       | 7/14/1847    | London      | 7/17/1847 | Wheat                       | <i>James Edward</i>                                     |
| <i>Victoria</i>   | 8/21/1847    | London      | 8/21/1847 | Marble, clove seeds, hams   | <i>George Henry</i>                                     |
| <i>British</i>    | 7/7/1849     | London      | 7/7/1849  | Ballast                     | <i>Thomas Henry</i>                                     |
| <i>Queen</i>      |              |             |           |                             |                                                         |
| <i>William</i>    | 4/27/1844    | Newcastle   | 4/27/1844 | Kelp (ash)                  | <i>Jane</i>                                             |
| <i>Irwin</i>      |              |             |           |                             |                                                         |

See Table S3 for further details on Pictou ships.

Additional references:

1. Hardiman J (1820) *The History of the Town and County of the Town of Galway* (W. Folds & Sons, Dublin), pp 286-289.

2. Harbour Master Reports, Galway, 1950, 1952. Held as microfilm, Special Collections, National University of Galway-Ireland.

3. Kinahan GH (1869) The sea-weeds of Yar-connaught, and their uses. *Quart J Sci* 6:331-340.

\* Galway was a major exporter of “kelp” (a source of soda for linen manufacturing, the soap industry etc.) to other areas of Ireland and Britain in the 18th and 19th Centuries (Hardiman, 1820). Kelp was produced by burning seaweeds belonging to the Laminariales and Fucales, including *F. serratus* (Kinahan 1869). Large quantities of fucacean seaweed (e.g., *F. serratus*) were transported to Galway from surrounding shores of County Galway and sold as manure for soil enrichment in agriculture (Kinahan 1869). Such seaweed arrived by various means, including by boats that were unloaded on the wet docks where ballast was discharged and loaded (e.g., Galway Harbour Master Reports 1850, 1852).
