# Supplementary material
Source: PubMed Central journal article supplement (PMC2688860)
Supplement: 0812300106_ST6_PDF.pdf [file 0812300106_ST6_PDF.pdf]

**Table S6. Collecting sites for *F. serratus* (Fs) and *Littorina littorea* (Ll) [excluding Ll sites previously published (ref. 17)]**

| Site                                     | Latitude, Longitude                |
|------------------------------------------|------------------------------------|
| North America                            |                                    |
| Caplin Cove, N.S. (Fs, Ll)               | 45° 37' 33." N, 60° 31' 9.18" W    |
| Inverness, N.S. (Fs)                     | 46° 14' 44.30" N, 61° 18' 25.72" W |
| Pictou, N.S. (Fs, Ll)                    | 45° 41' 10.16" N, 62° 40' 50.19" W |
| Europe                                   |                                    |
| Ålesund (Fs)                             | 62° 28' 16.29" N, 06° 05' 56.04" E |
| Bangor, Northern Ireland (Fs)            | 54° 40' 01.37" N, 05° 40' 01.43" W |
| Bergen, Norway (Fs)                      | 60° 16' 07.45" N, 05° 12' 59.12" E |
| Bodø, Norway (Fs)                        | 67° 16' 39.71" N, 14° 30' 43.60" E |
| Cromarty, Scotland (Fs, Ll)              | 57° 40' 45.14" N, 4° 1' 28.41" W   |
| Fort William, Scotland (Fs, Ll)          | 56° 48' 24.19" N, 5° 7' 45.26" W   |
| Galway, Ireland (Fs)                     | 55° 15' 52.96" N, 08° 54' 12.45" W |
| Galway (Spiddal), Ireland (Ll)           | 53° 14' 31.21" N, 9° 17' 9.06" W   |
| Giant's Causeway, Northern Ireland (Fs)  | 55° 15' 07.71" N, 06° 29' 29.87" W |
| Gjerrild Klint, Denmark (Fs)             | 56° 31' 02.86" N, 10° 52' 04.81" E |
| Greenock, Scotland (Fs, Ll)              | 55° 57' 5.50" N, 4° 45' 20.72" W   |
| Jersey, Channel Islands (Fs)             | 49° 14' 34.78" N, 02° 05' 12.14" W |
| Karlshamn, Sweden (Fs)                   | 56° 09' 35.03" N, 14° 55' 19.82" E |
| I'lle de Siec, France (Fs)               | 48° 41' 51.32" N, 04° 07' 51.17" W |
| Limerick, Ireland (Fs)                   | 52° 37' 49.77" N, 09° 01' 32.65" W |
| Limerick (Kilcloher Cross), Ireland (Ll) | 52° 33' 58.80" N, 9° 48' 19.07" W  |
| Nyborg, Norway (Fs)                      | 70° 09' 26.22" N, 29° 08' 50.61" E |
| Peterhead, Scotland (Fs, Ll)             | 57° 30' 39.70" N, 1° 46' 34.87" W  |
| Pl. du Lividie, France (Fs)              | 48° 41' 31.55" N, 04° 10' 09.31" W |
| Plymouth, England (Fs)                   | 50° 20' 55.92" N, 04° 07' 38.97" W |
| Reykjavik, Iceland (Fs)                  | 64° 16' 39.71" N, 14° 30' 43.60" W |
| Roscoff, France (Fs)                     | 48° 43' 51.32" N, 03° 59' 37.74" W |
| Rousay (Orkney), Scotland (Fs)           | 59° 13' 16.99" N, 02° 58' 32.50" W |
| Sligo (Raghly), Ireland (Fs, Ll)         | 54° 19' 21.11" N, 8° 39' 6.24" W   |
| Smaskjaer, Norway (Fs)                   | 59° 39' 58.32" N, 10° 34' 41.64" E |
| St. Valerie en Caux, France (Fs)         | 49° 53' 05.82" N, 00° 43' 26.00" E |
| Suduroy, Faroes (Fs)                     | 61° 34' 24.97" N, 06° 47' 59.89" W |
| Trondheim, Norway (Fs)                   | 63° 27' 14.56" N, 10° 28' 19.70" E |
| Ullapool (Leckmelm), Scotland (Fs, Ll)   | 57° 51' 54.76" N, 5° 5' 47.85" W   |
| Wexford, Ireland (Fs)                    | 52° 20' 20.23" N, 00° 43' 26.00" E |
